# Supplementary material
Source: PubMed Central journal article supplement (PMC2939947)
Supplement: NIHMS199902-supplement-01.pdf [file NIHMS199902-supplement-01.pdf]

## Supplemental Material and Methods

**Skin samples.** Skin punch biopsies (6mm diameter) were obtained from normal volunteers and psoriasis patients under Rockefeller University IRB-approved protocols. Informed consent was obtained and the studies were performed in adherence with the Principles of the Declaration of Helsinki. The lesional tissue for CD163, RFD7, and LAMP2 staining was obtained from a group of patients with moderate-to-severe psoriasis (body surface area >10%) enrolled in a clinical trial (clinicaltrials.gov NCT00115076). There were seven males and three females, and mean age was 41 years. Most patients had been using topical therapy alone, three had used prior systemic agents. All patients had not used topical agents for 2 weeks nor systemics for 4 weeks prior to the biopsy being taken. Paired psoriasis non-lesional and lesional RNA for microarray studies were from baseline biopsies of patients enrolled in another study with the same inclusion and exclusion criteria (clinicaltrials.gov NCT00116181) (Zaba *et al.*, 2009b). The microarray was performed using the same Illumina HT-12 chips that were used for the cultured macrophages. Patient lesional skin biopsies for other immunohistochemistry and immunofluorescence stains were from samples that also met the above inclusion and exclusion criteria. Biopsies were frozen in OCT (Sakura, Tokyo, Japan) and stored at -80 °C for immunohistochemistry and immunofluorescence.

**Antibodies.** All antibodies used for immunohistochemistry and immunofluorescence are listed in Table S6.

**Immunohistochemistry.** Normal and psoriasis lesional skin sections (n=5-10) were stained with macrophage markers CD163, RFD7, LAMP2, CD68, Stabilin, and MARCO (dilutions listed in Table S6). Biotin-labeled horse anti-mouse and biotin-labeled goat anti-rabbit antibodies

(Vector Laboratories) were used to detect the mouse monoclonal and rabbit polyclonal antibodies, respectively. The staining signal was amplified with avidin-biotin complex (Vector Laboratories) and developed using chromogen 3-amino-9-ethylcarbazole (Sigma-Aldrich). The number of positive cells per mm epidermis surface length was counted manually using computer-assisted image analysis (NIH Image 6.1;<http://rsb.info.nih.gov/nih-image>). The cell counts were also calculated per area of the dermis (Figure S6). Cell counts were analyzed by Mann Whitney U test and significance was accepted as  $p < 0.05$ .

**Immunofluorescence.** Frozen skin sections from psoriasis patients (n=5) were fixed with acetone and blocked in 10% normal goat serum (Vector Laboratories) for 30 minutes. Primary antibodies CD163 and CD11c were incubated overnight at 4°C and amplified with the appropriate secondary antibody (goat anti-mouse IgG1 conjugated to Alexa Fluor 488 or 568) for 30 minutes. For colocalization with CD163 or CD11c, sections were then co-stained overnight with a second antibody, as listed in Table S6, and amplified with the appropriate secondary antibody (Table S6) for 30 minutes.

Images were acquired using the appropriate filters of a Zeiss Axioplan 2 widefield fluorescence microscope with a Plan Neofluar 20 x 0.7 numerical aperture lens and a Hamamatsu Orca ER-cooled charge-coupled device camera, controlled by METAVUE software (MDS Analytical Technologies, Downington, PA). Alternatively, images were acquired using appropriate filters of an upright confocal microscope Zeiss Axioplan 2 (LSM 510) with C-Apochromat 40x/1.2 W objective using Argon/Krypton laser-488nm and 568nm. Images in each figure are presented both as single color stains (green and red) located above the merged image, so that localization of two markers on similar or different cells can be appreciated. Cells that coexpress the two markers in a similar location are yellow in color. A white line denotes the

dermoepidermal junction. Dermal collagen fibers gave green autofluorescence, and antibodies conjugated with a fluorochrome often gave background epidermal fluorescence. Size bar = 100  $\mu\text{m}$

**Macrophage cultures.** Peripheral blood mononuclear cells from normal blood donor buffy coats (New York Blood Center) (n=7) were purified by gradient centrifugation with Ficoll-Paque Plus (Pharmacia, Piscataway, NJ, U.S.A.), and collected at the interface. Monocytes were isolated by plastic adherence. Macrophages were generated by culturing monocytes for 7 days in RPMI (Invitrogen) supplemented with human M-CSF (50ng/ml) plus 1% HSA. Macrophage phenotype was confirmed by flow cytometry as CD163<sup>+</sup>, CD68<sup>+</sup>, HLA-DR<sup>+</sup>, CD86<sup>+</sup>, CD11c<sup>lo</sup>, CD83<sup>-</sup> (data not shown). Macrophage polarization was determined by removing the culture medium and culturing cells for an additional 24 hours in RPMI supplemented with 20 ng/ml IFN- $\gamma$  (for M1 polarization), 25ng/ml IL-4 (for M2 polarization), 20ng/ml TNF- $\alpha$ , 1 ug/ml LPS, and 1 ug/ml LPS plus 20ng/ml IFN- $\gamma$ . Cells were harvested in RLT buffer and stored in -80°C for RNA extraction.

**Reverse transcriptase-polymerase chain reaction.** RNA was extracted from cultured macrophages using the RNeasy Mini KIT (Qiagen, Valencia, CA, U.S.A.). Reverse transcriptase (RT)-polymerase chain reaction (PCR) was performed using EZ PCR core reagents, primers and probes (Applied Biosystems, Foster City, CA, U.S.A.) as previously published (Chamian *et al.*, 2005). Sequences of primers and probes used in this study are as follows: IL23p19 (Assay ID Hs00372324\_m1), IL23p40 Forward: ACATCTACCGAAGTCCAATGCA Reverse: GGAATTGTAATAGCGATCCTGAGC Probe:6-FAM TGCACGCAGACATTCCCGCCT-TAMRA (Gene Bank Accession Number AF180563), IL12p35 (Assay ID Hs00168405\_m1), and CCL20 (Assay ID Hs00171125\_m1). The results

were normalized to HARP housekeeping gene and analyzed with Applied Biosystems PRISM 7700. RT-PCR data was analyzed using a repeated measures ANOVA and Dunnett's Multiple Comparison Test was used to compare with control. The p values were designated as  $p < 0.05$  (\*),  $p < 0.01$  (\*\*) and  $p < 0.001$  (\*\*\*).

**Gene Array.** RNA extracted from cultured macrophages (biological replicates  $n=7$ ) and psoriasis non-lesional and lesional biopsies ( $n=5$  pairs) was amplified and labeled (Message Amp Premier RNA Amplification Kit, Ambion Inc., TX). A total of 750ng of biotinylated cRNA was hybridized to Illumina Human HT-12 Bead Chip (Illumina, Inc. San Diego, CA, USA). Data was read and preprocessed using the *lumi* package available at R/Bioconductor (<http://www.bioconductor.org/>). Quantile normalization was used to normalize all microarray chips. Probes with standard deviation greater than 0.1 or present in more than 4 samples were kept for further analysis (a probe was called present if detection p-value was smaller than 0.1). To compare gene expression of *in vitro* cytokine treated macrophages versus control, and lesional versus non-lesional samples of psoriasis tissues, a moderated paired t-test available in *limma* package from R/Bioconductor was used. P values were adjusted for multiple hypotheses using the Benjamini–Hochberg procedure, which controls the false discovery rate (FDR). Genes were considered significant if they had a fold change (FCH) greater than 2, and FDR less than 0.01. The log-2 fold change for cytokine treated macrophages were clustered using a hierarchical cluster with Pearson correlation coefficient and presented in a heatmap. Gene Set Enrichment Analysis (GSEA) approach (Subramanian *et al.*, 2005; Zaba *et al.*, 2009a) was used to correlate the response profile of the macrophage pathways in psoriasis lesional versus non-lesional skin.

The data discussed in this publication have been deposited in NCBI's Gene Expression Omnibus and are accessible through GEO Series accession number GSE18686.

## References

Chamian F, Lowes MA, Lin SL, Lee E, Kikuchi T, Gilleaudeau P, *et al.* (2005). Alefacept reduces infiltrating T cells, activated dendritic cells, and inflammatory genes in psoriasis vulgaris. *Proc Natl Acad Sci U S A* 102:2075-2080.

Subramanian A, Tamayo P, Mootha VK, Mukherjee S, Ebert BL, Gillette MA, *et al.* (2005). Gene set enrichment analysis: a knowledge-based approach for interpreting genome-wide expression profiles. *Proc Natl Acad Sci U S A* 102:15545-15550.

Zaba LC, Fuentes-Duculan J, Eungdamrong NJ, Abello MV, Novitskaya I, Pierson KC, *et al.* (2009a). Psoriasis Is Characterized by Accumulation of Immunostimulatory and Th1/Th17 Cell-Polarizing Myeloid Dendritic Cells. *J Invest Dermatol* 129:79-88.

Zaba LC, Suarez-Farinas M, Fuentes-Duculan J, Nograles KE, Guttman-Yassky E, Cardinale I, *et al.* (2009b). Effective treatment of psoriasis with etanercept is linked to suppression of IL-17 signaling, not immediate response TNF genes. *J Allergy Clin Immunol* 124:1022-1010 e1021-1395.

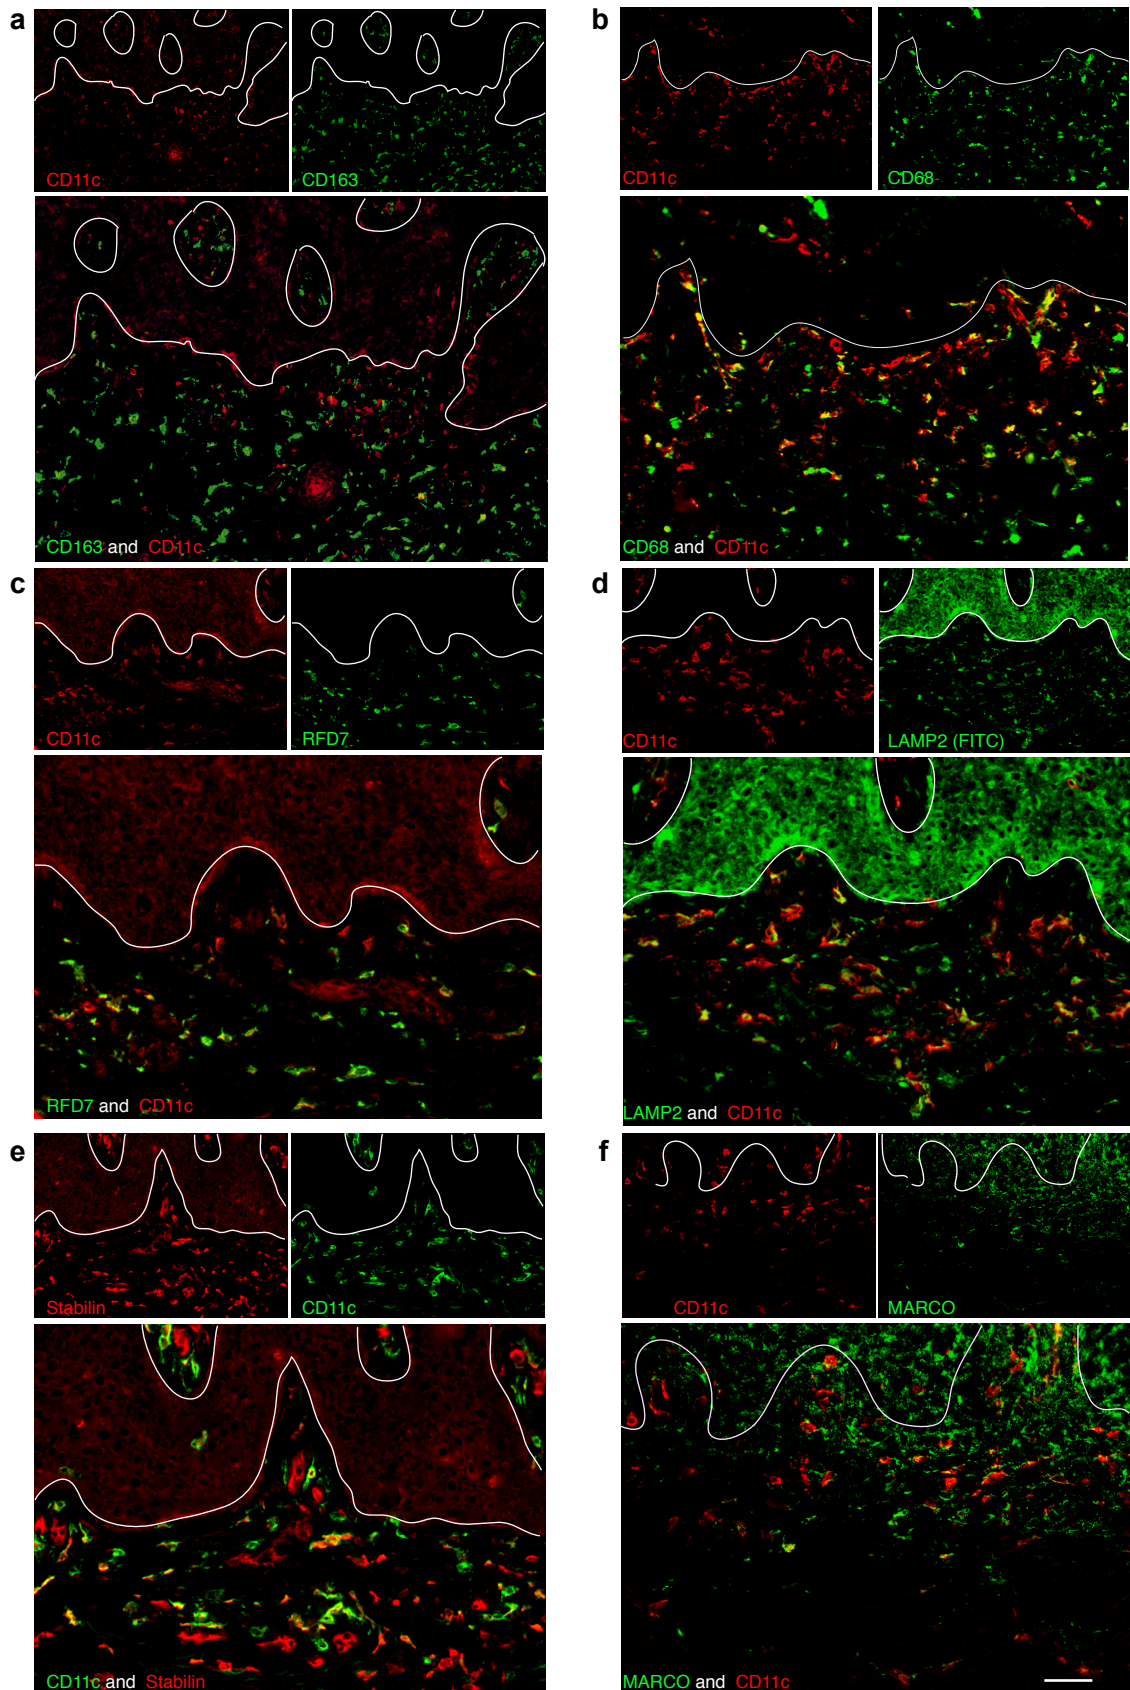

**Figure S1. CD11c coexpression with macrophage markers in psoriasis lesions.** a) CD11c was coexpressed on a few CD163<sup>+</sup> cells. There was greater co-expression of CD11c with (b) CD68, (c) RFD7, (d) LAMP2, (e) Stabilin, and (f) MARCO. Bar =100  $\mu$ m

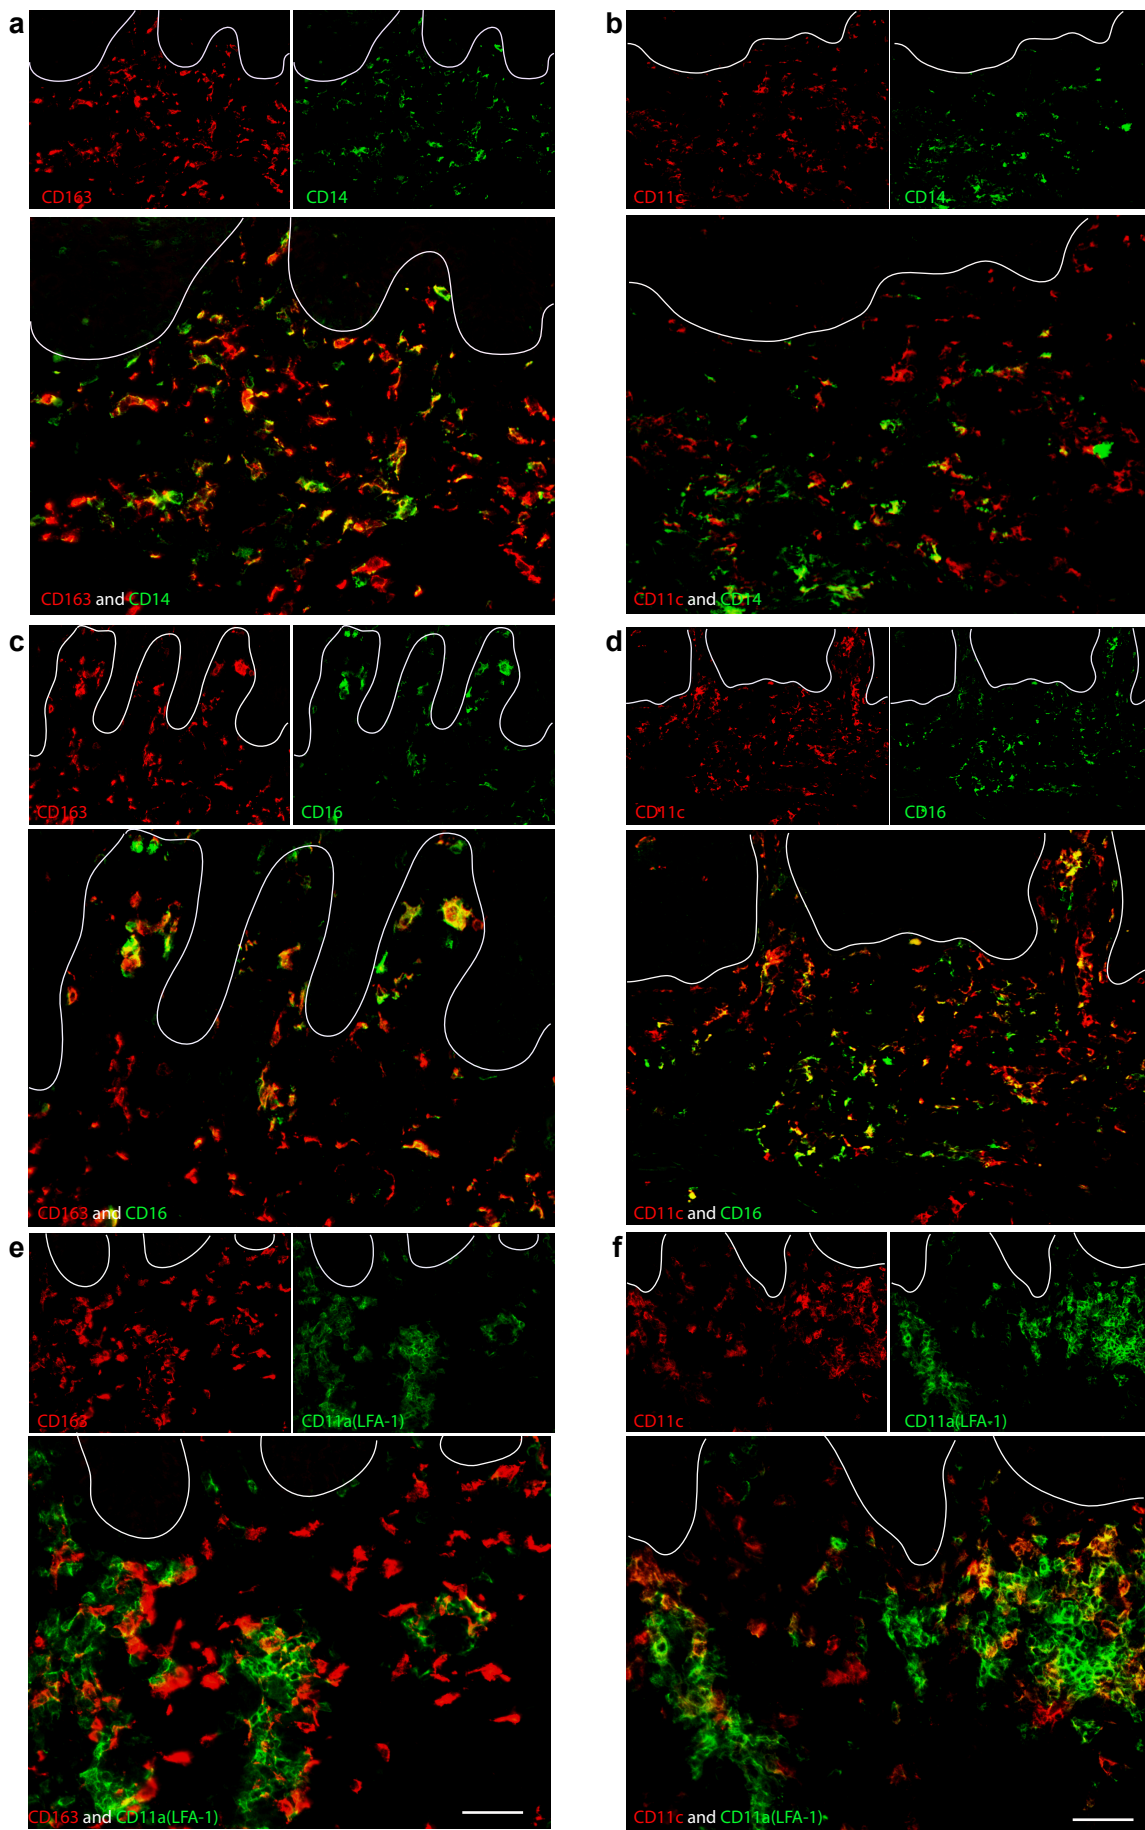

**Figure S2. CD163<sup>+</sup> macrophages also expressed CD14, CD16 and LFA-1 in psoriasis lesional skin.** (a, b) CD163 showed greater coexpression of CD14 than CD11c<sup>+</sup> DCs. CD16 (c, d) and LFA-1 (e, f) were present on both CD163<sup>+</sup> macrophages and CD11c<sup>+</sup> DCs. Bar =100  $\mu$ m

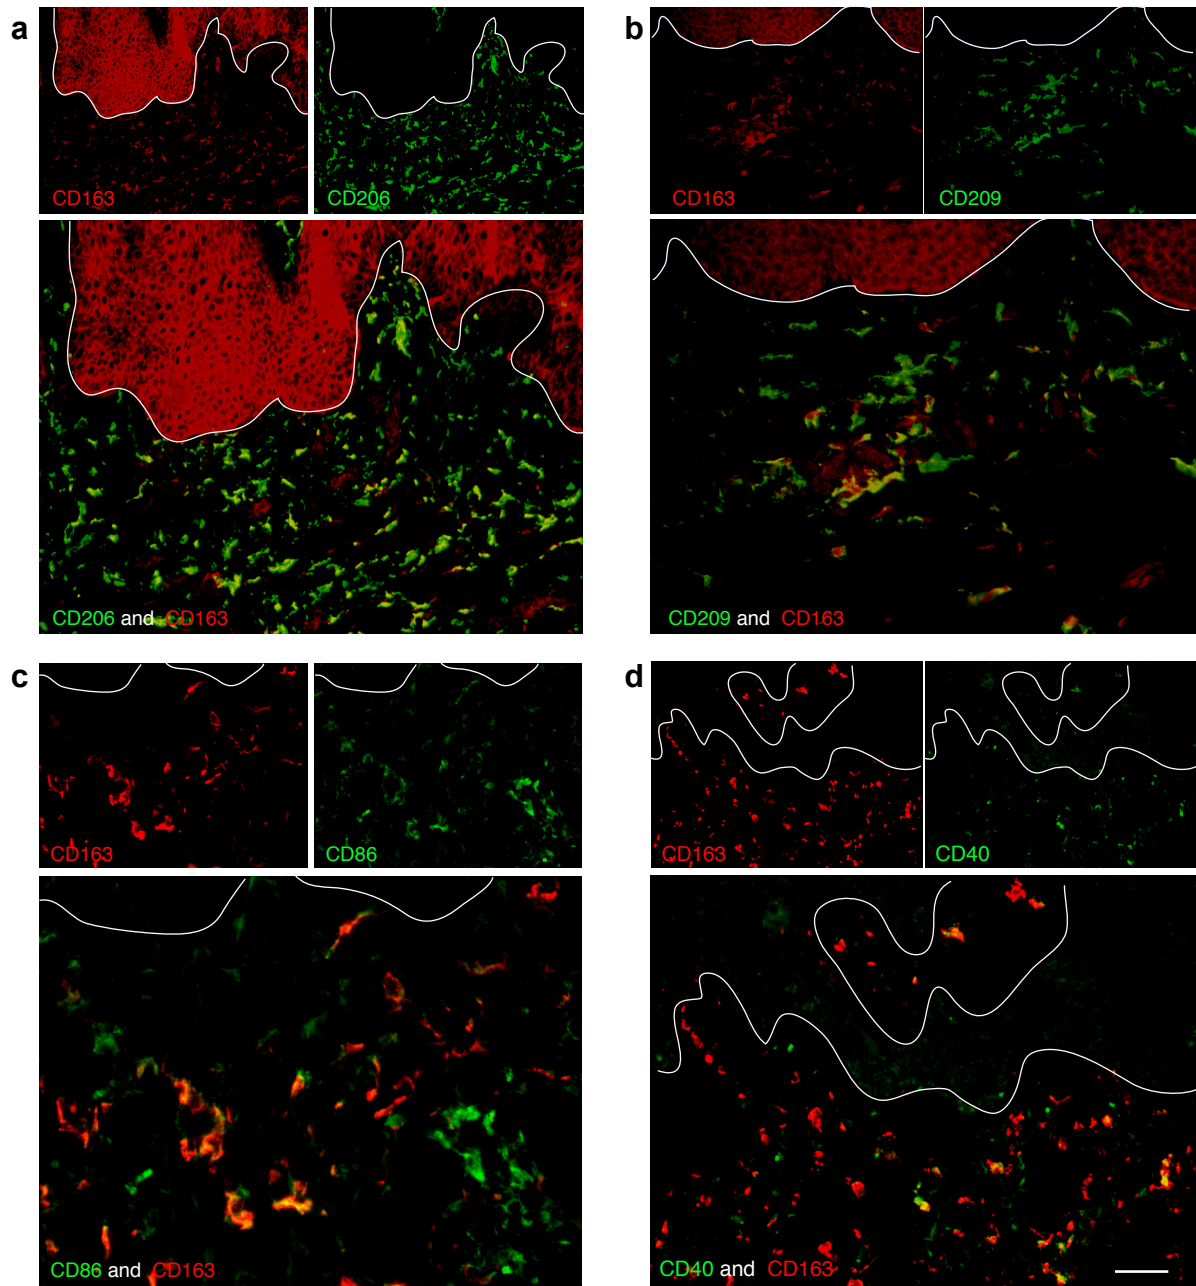

**Figure S3. CD163<sup>+</sup> macrophages also expressed C-lectins and co-stimulatory molecules in psoriasis lesional skin.** (a) Almost all CD163<sup>+</sup> cells co-expressed CD206, and (b) the majority coexpressed CD209. Less than half of the CD163<sup>+</sup> cells co-expressed the co-stimulatory molecules (c) CD86 and (d) CD40. Bar =100  $\mu$ m



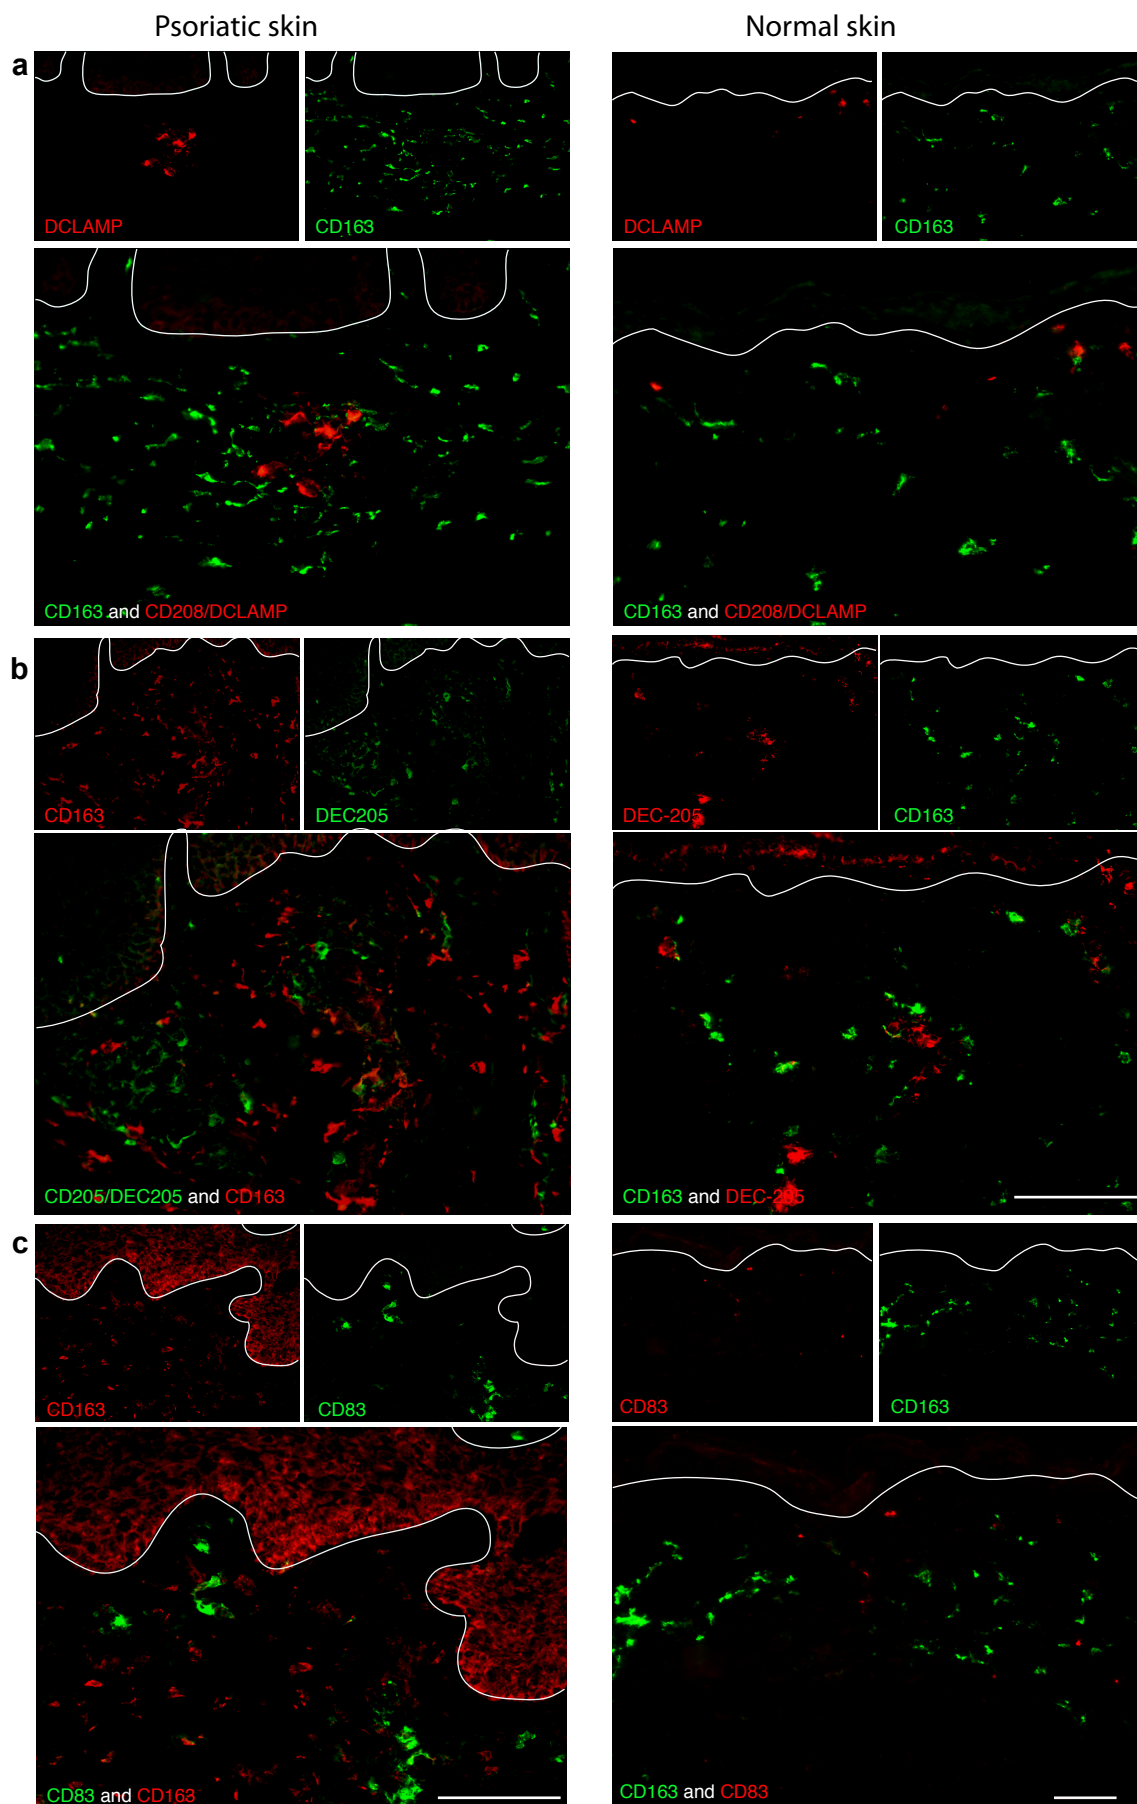

**Figure S4. Macrophages in psoriasis lesions and normal skin did not express mature DC markers.** CD 163<sup>+</sup> macrophages did not co-express well-recognized DC maturation markers (a) CD208/DC-LAMP, (b)CD205/DEC-205, and (c) CD83. Bar =100  $\mu$ m

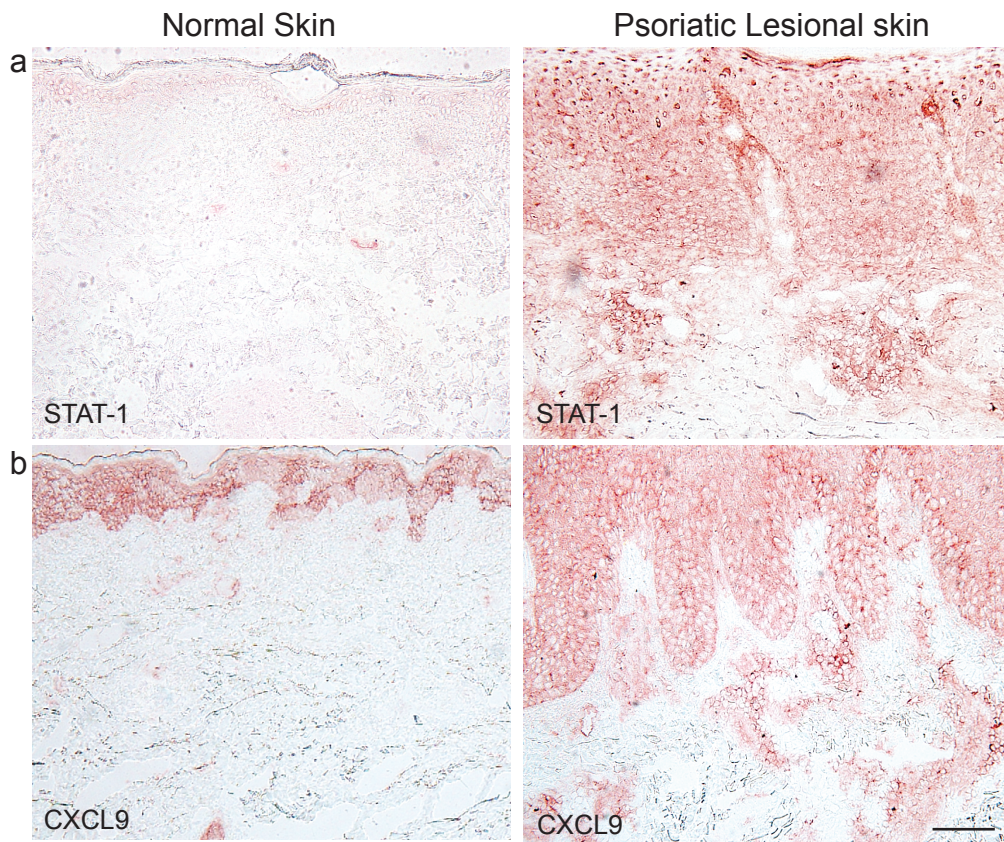

**Figure S5. IFN- $\gamma$  induced genes STAT-1 and CXCL9 immunohistochemistry in normal skin and psoriasis lesions.** (a) STAT-1 expression was increased in psoriasis compared to normal skin. (b) CXCL9 showed low level expression in normal skin, and was increased in psoriasis. Bar =100  $\mu$ m

## Method A - Analysis field defined by epidermis surface length

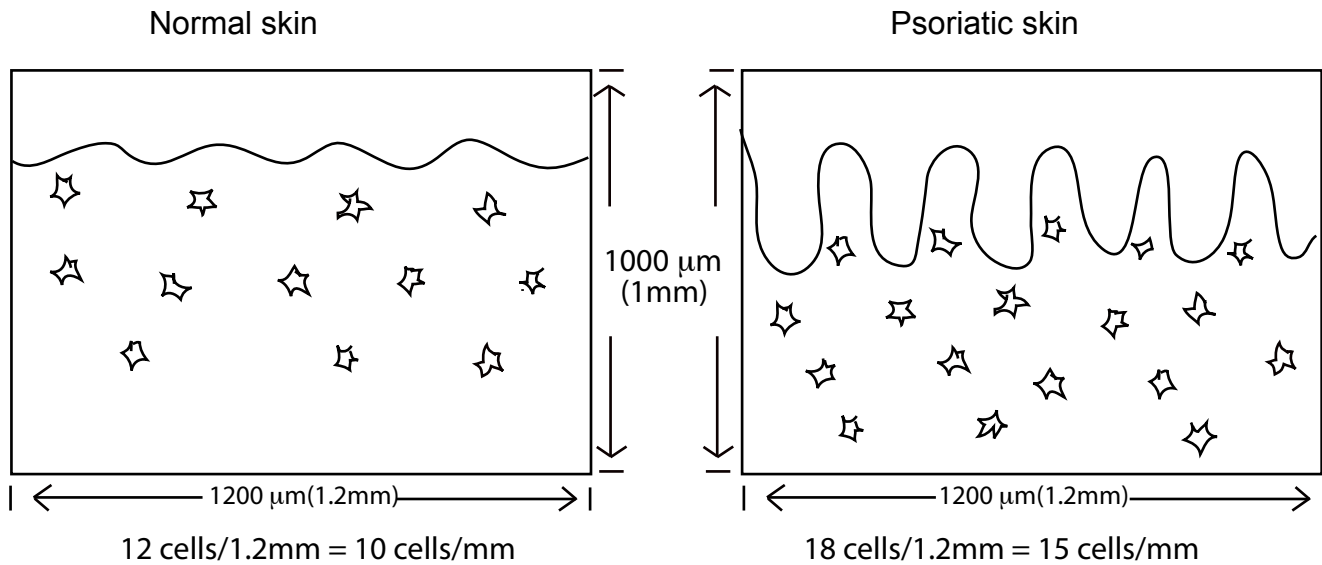

## Method B - Analysis field defined by cell density per square area ( $\text{mm}^2$ ) of dermis

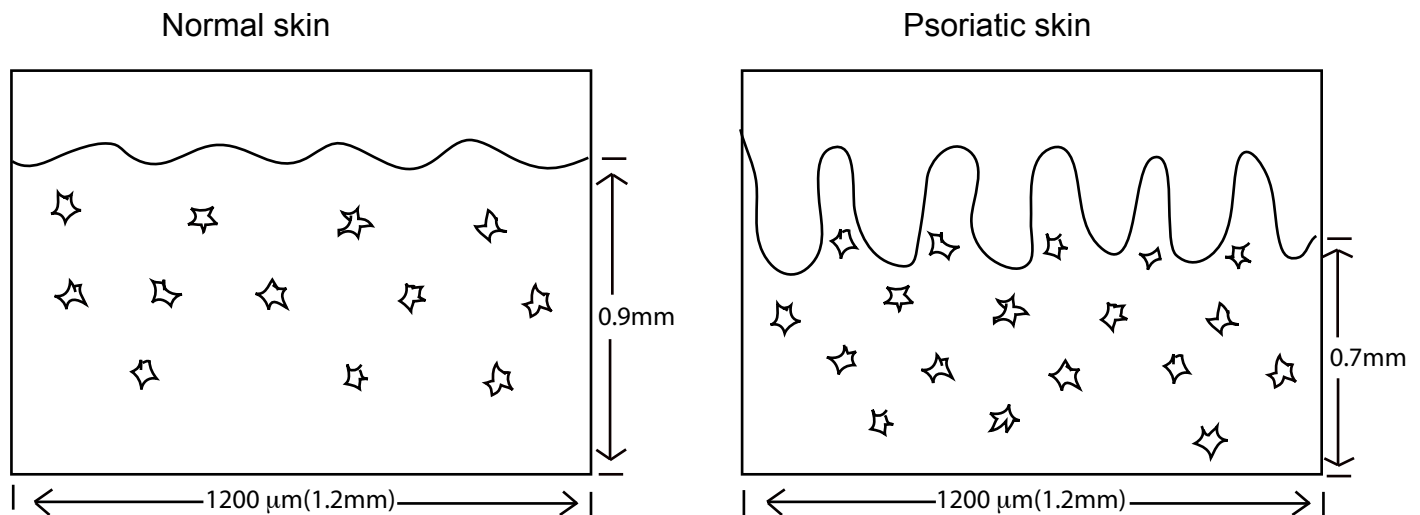

\*e.g. area of dermis =  $0.9\text{mm} \times 1.2\text{mm} = 1.08 \text{mm}^2$

$$12 \text{ cells}/1.08\text{mm}^2 = 11 \text{ cells}/\text{mm}^2$$

area of dermis =  $0.7\text{mm} \times 1.2\text{mm} = 0.84 \text{mm}^2$

$$18 \text{ cells}/0.84\text{mm}^2 = 21 \text{ cells}/\text{mm}^2$$

**Figure S6. Methods for counting cells.** The diagrams illustrate two methods used for counting cells. In **Method A**, a representative image is captured, which is a field measuring  $1000\mu\text{m}$  (1mm)  $\times$   $1200\mu\text{m}$  (1.2mm). The cells are counted manually using computer-assisted image analysis (NIH Image 6.1; <http://rsb.info.nih.gov/nih-image>), and the number quantified per epidermis surface length. Examples for normal skin and psoriasis are shown. This method was used to obtain cell counts for Figure 1. In **Method B**, the same number of cells are counted, but cell number is calculated per area of dermis. Examples of the area of dermis are shown, but the image J program is used to calculate the actual area. This method was used to obtain cell counts for Table S1.

**Table S1. Macrophage markers used in this study**

| Macrophage Marker                                                                                                     | Description/ Function                                                                                                                                                                                                      | Cell counts / square area |
|-----------------------------------------------------------------------------------------------------------------------|----------------------------------------------------------------------------------------------------------------------------------------------------------------------------------------------------------------------------|---------------------------|
| <b>CD163</b><br>Hemoglobin Scavenger Receptor                                                                         | Exclusive expression in monocyte-macrophage system ; Immunologic function is homeostatic, participates in adhesion to endothelial cells, tolerance induction and tissue regeneration<br><br>(Moestrup, 2004; Onofre, 2009) | <p>CD163</p>              |
| <b>RFD7</b>                                                                                                           | Recognizes mature tissue macrophages ; Responsible for TNF- $\alpha$ production in alveolar macrophages<br><br>(Taams, 1999; Pantelidis, 2001)                                                                             | <p>RFD7</p>               |
| <b>CD68</b><br>Macrosialin                                                                                            | Highly expressed by human monocytes and tissue macrophages ; Expresses both IL-12 and IL-23<br><br>(Ochoa, 2008; Yawalkar, 2009)                                                                                           | <p>CD68</p>               |
| <b>LAMP2</b><br>(Lysosomal-Associated Membrane Protein 2)<br>LAMPB<br>LGP110                                          | Protects the lysosomal membrane from proteolytic enzymes within lysosomes ; Acts as a receptor for proteins to be imported into lysosomes<br><br>(Eskelinen, 2006)                                                         | <p>LAMP2</p>              |
| <b>Stabilin-1</b><br>MS-1 Antigen<br>FEEL1                                                                            | Expressed in sinusoidal endothelial cells and macrophages ; Endocytic and sorting receptor, internalization of acLDL<br><br>(Kzhyshkowska, 2004; Hansen, 2005)                                                             | <p>Stabilin</p>           |
| <b>MARCO</b><br>(Macrophage Receptor with Collagenous structure)<br>Scavenger Receptor Class A, Member 2<br>(SCARA 2) | Transmembrane protein of the Class A scavenger receptor family ; Scavenging of bacteria, inhaled particles and airborne pathogens<br><br>(Sankala, 2002; Arredouani, 2005)                                                 | <p>MARCO</p>              |

\* p < 0.05, \*\* p < 0.01, \*\*\* p < 0.001

Table S2.xls

Psoriasis\_LSVsNL\_p01fch2\_Macrophages

1 upregulated, -1 is down-regulated

| PROBE_ID | SYMBOL      | DEFINITION | CHROMOSOME       | Ps LS-NL | Ps LS-NL_P | PS LS-NL_FDR | IFNg -C | IL4 -C | TNFA-C | LPS -C | LPSandIFNg -C | IFNg -C_P | IL4 -C_P | TNFA-C_P | LPS -C_P | LPSandIFNg -C_P | IFNg -C_FDR | IL4 -C_FDR | TNFA-C_FDR | LPS -C_FDR | LPSandIFNg -C_FDR | IFNg | IL4 | TNFA | LPS | LPSandIFNg |    |
|----------|-------------|------------|------------------|----------|------------|--------------|---------|--------|--------|--------|---------------|-----------|----------|----------|----------|-----------------|-------------|------------|------------|------------|-------------------|------|-----|------|-----|------------|----|
| 29       | ILMN_167781 | ABCC3      | ATP-binding ca   | 17       | -1.022     | 0.000        | 0.000   | -0.42  | 0.29   | 0.16   | -0.17         | -0.80     | 0.19     | 0.36     | 0.61     | 0.58            | 0.01        | 0.29       | 0.81       | 0.93       | 0.86              | 0.03 | 0   | 0    | 0   | 0          | 0  |
| 81       | ILMN_176385 | ACACB      | acetyl-Coenzym   | 12       | -1.432     | 0.000        | 0.000   | -0.17  | -0.01  | -0.09  | -0.33         | -0.16     | 0.22     | 0.96     | 0.52     | 0.02            | 0.26        | 0.33       | 1.00       | 0.90       | 0.30              | 0.35 | 0   | 0    | 0   | 0          | 0  |
| 109      | ILMN_171554 | ACOT1      | acyl-CoA thioe   | 14       | -1.041     | 0.000        | 0.000   | -0.08  | -0.26  | -0.02  | -0.06         | 0.05      | 0.55     | 0.06     | 0.89     | 0.69            | 0.73        | 0.66       | 0.40       | 0.98       | 0.90              | 0.80 | 0   | 0    | 0   | 0          | 0  |
| 120      | ILMN_168570 | ACOX2      | acyl-Coenzym     | 3        | -1.384     | 0.000        | 0.000   | -1.36  | -0.42  | -0.39  | -0.47         | -1.63     | 0.00     | 0.24     | 0.27     | 0.18            | 0.00        | 0.00       | 0.71       | 0.77       | 0.59              | 0.00 | -1  | 0    | 0   | 0          | -1 |
| 125      | ILMN_207859 | ACP5       | acid phosphat    | 19       | 1.054      | 0.000        | 0.000   | -1.92  | 0.04   | -0.56  | -0.83         | -2.39     | 0.00     | 0.91     | 0.14     | 0.03            | 0.00        | 0.00       | 0.99       | 0.65       | 0.33              | 0.00 | -1  | 0    | 0   | 0          | -1 |
| 128      | ILMN_175832 | ACPP       | acid phosphat    | 3        | 1.362      | 0.000        | 0.000   | -0.23  | -0.04  | -0.27  | 0.03          | -0.10     | 0.22     | 0.82     | 0.15     | 0.86            | 0.58        | 0.33       | 0.98       | 0.67       | 0.96              | 0.67 | 0   | 0    | 0   | 0          | 0  |
| 187      | ILMN_210310 | ADAMDEC1   | ADAM-like, dex   | 8        | 1.540      | 0.000        | 0.000   | 0.49   | -0.72  | 0.47   | 0.48          | 0.78      | 0.01     | 0.00     | 0.01     | 0.01            | 0.72        | 0.02       | 0.01       | 0.26       | 0.22              | 0.00 | 0   | 0    | 0   | 0          | 0  |
| 237      | ILMN_169559 | ADRB2      | adrenergic, bel  | 5        | -1.373     | 0.000        | 0.000   | 0.31   | -0.34  | -0.20  | 0.11          | 0.72      | 0.29     | 0.23     | 0.48     | 0.70            | 0.01        | 0.40       | 0.70       | 0.89       | 0.91              | 0.03 | 0   | 0    | 0   | 0          | 0  |
| 275      | ILMN_179487 | AGPAT9     | 1-acylglycerol   | 4        | 1.183      | 0.000        | 0.000   | -1.67  | -0.52  | -0.38  | -0.73         | -2.29     | 0.00     | 0.21     | 0.35     | 0.08            | 0.00        | 0.00       | 0.67       | 0.82       | 0.46              | 0.00 | -1  | 0    | 0   | 0          | -1 |
| 337      | ILMN_171312 | AKR1C3     | aldo-keto redu   | 10       | -1.068     | 0.000        | 0.000   | -0.98  | -1.54  | 0.24   | -0.48         | -1.52     | 0.01     | 0.00     | 0.53     | 0.21            | 0.00        | 0.03       | 0.01       | 0.91       | 0.62              | 0.00 | 0   | -1   | 0   | 0          | -1 |
| 351      | ILMN_167087 | ALCAM      | activated leukc  | 3        | -1.235     | 0.000        | 0.000   | -0.30  | -0.34  | 0.25   | 0.15          | -0.34     | 0.32     | 0.26     | 0.41     | 0.61            | 0.25        | 0.43       | 0.73       | 0.85       | 0.67              | 0.34 | 0   | 0    | 0   | 0          | 0  |
| 360      | ILMN_179482 | ALDH3A2    | aldehyde dehy    | 17       | -1.047     | 0.000        | 0.000   | -1.16  | -0.55  | -0.15  | -0.44         | -1.42     | 0.00     | 0.00     | 0.39     | 0.02            | 0.00        | 0.00       | 0.06       | 0.84       | 0.28              | 0.00 | -1  | 0    | 0   | 0          | -1 |
| 361      | ILMN_240164 | ALDH3A2    | aldehyde dehy    | 17       | -1.006     | 0.000        | 0.000   | -1.09  | -0.46  | -0.04  | -0.48         | -1.26     | 0.00     | 0.01     | 0.80     | 0.01            | 0.00        | 0.00       | 0.15       | 0.97       | 0.22              | 0.00 | -1  | 0    | 0   | 0          | -1 |
| 403      | ILMN_239314 | ALOX15B    | arachidonate 1   | 17       | -1.437     | 0.000        | 0.000   | 0.94   | 0.89   | 1.05   | 0.38          | 0.76      | 0.00     | 0.00     | 0.00     | 0.12            | 0.00        | 0.00       | 0.02       | 0.02       | 0.52              | 0.01 | 0   | 0    | 1   | 0          | 0  |
| 422      | ILMN_177937 | AMMECR1    | Alport syndrom X | 1        | 1.223      | 0.000        | 0.000   | 0.05   | 0.01   | -0.01  | 0.04          | 0.11      | 0.58     | 0.95     | 0.92     | 0.71            | 0.24        | 0.69       | 1.00       | 0.99       | 0.91              | 0.33 | 0   | 0    | 0   | 0          | 0  |
| 431      | ILMN_180130 | AMY2A      | amylase, alpha   | 1        | -1.086     | 0.000        | 0.000   | -0.59  | -0.21  | 0.17   | -0.08         | -0.65     | 0.00     | 0.18     | 0.28     | 0.60            | 0.00        | 0.00       | 0.64       | 0.78       | 0.87              | 0.00 | 0   | 0    | 0   | 0          | 0  |
| 446      | ILMN_176072 | ANG        | angiogenin, rib  | 14       | -1.394     | 0.000        | 0.000   | -0.03  | -0.78  | -0.71  | -0.57         | 0.00      | 0.93     | 0.02     | 0.03     | 0.07            | 0.99        | 0.96       | 0.19       | 0.38       | 0.45              | 1.00 | 0   | 0    | 0   | 0          | 0  |
| 472      | ILMN_221582 | ANKRD20A1  | ankyrin repeat   | 9        | -1.331     | 0.000        | 0.000   | -0.65  | -0.80  | -0.49  | -0.28         | -0.87     | 0.02     | 0.01     | 0.08     | 0.30            | 0.00        | 0.05       | 0.10       | 0.54       | 0.70              | 0.01 | 0   | 0    | 0   | 0          | 0  |
| 474      | ILMN_179984 | ANKRD22    | ankyrin repeat   | 10       | 1.021      | 0.000        | 0.000   | 3.76   | -0.02  | 0.58   | 0.79          | 4.24      | 0.00     | 0.97     | 0.25     | 0.12            | 0.00        | 0.00       | 1.00       | 0.75       | 0.53              | 0.00 | 1   | 0    | 0   | 0          | 1  |
| 594      | ILMN_178900 | APOC1      | apolipoprotein   | 19       | -1.714     | 0.000        | 0.000   | -1.43  | -0.58  | -0.28  | -0.82         | -1.56     | 0.00     | 0.13     | 0.46     | 0.04            | 0.00        | 0.00       | 0.56       | 0.88       | 0.35              | 0.00 | -1  | 0    | 0   | 0          | -1 |
| 597      | ILMN_178017 | APOD       | apolipoprotein   | 3        | -1.468     | 0.000        | 0.000   | 0.05   | 0.06   | -0.02  | -0.04         | 0.19      | 0.75     | 0.70     | 0.92     | 0.81            | 0.25        | 0.82       | 0.95       | 0.99       | 0.95              | 0.34 | 0   | 0    | 0   | 0          | 0  |
| 598      | ILMN_174093 | APOE       | apolipoprotein   | 19       | -1.237     | 0.000        | 0.000   | -0.62  | -0.56  | -0.03  | -0.41         | -0.61     | 0.06     | 0.09     | 0.94     | 0.20            | 0.07        | 0.51       | 0.47       | 0.99       | 0.61              | 0.11 | 0   | 0    | 0   | 0          | 0  |
| 618      | ILMN_171506 | AQP9       | aquaporin 9 (A   | 15       | -1.434     | 0.034        | 0.000   | 0.88   | 0.73   | 0.17   | 0.44          | 1.13      | 0.00     | 0.00     | 0.49     | 0.07            | 0.00        | 0.00       | 0.08       | 0.89       | 0.45              | 0.00 | 0   | 0    | 0   | 0          | 1  |
| 668      | ILMN_213280 | ARHGGEF10  | Rho guanine ni   | 8        | -1.108     | 0.000        | 0.000   | 0.15   | 0.08   | 0.09   | -0.01         | 0.03      | 0.30     | 0.59     | 0.50     | 0.92            | 0.83        | 0.41       | 0.91       | 0.90       | 0.98              | 0.87 | 0   | 0    | 0   | 0          | 0  |
| 710      | ILMN_212002 | ARL5B      | ADP-ribosylat    | 10       | 1.298      | 0.000        | 0.000   | 0.63   | 0.02   | 0.28   | 0.16          | 0.89      | 0.00     | 0.92     | 0.13     | 0.39            | 0.00        | 0.01       | 0.99       | 0.65       | 0.75              | 0.00 | 0   | 0    | 0   | 0          | 0  |
| 717      | ILMN_176981 | ARL6IP5    | ADP-ribosylat    | 3        | -1.006     | 0.000        | 0.000   | 0.09   | -0.04  | 0.24   | 0.21          | 0.14      | 0.21     | 0.59     | 0.00     | 0.00            | 0.05        | 0.32       | 0.91       | 0.10       | 0.17              | 0.09 | 0   | 0    | 0   | 0          | 0  |
| 869      | ILMN_165807 | ATP1B1     | ATPase, Na+/K    | 1        | 1.211      | 0.001        | 0.000   | -0.35  | 0.34   | -0.08  | -0.22         | -0.60     | 0.29     | 0.30     | 0.80     | 0.50            | 0.07        | 0.41       | 0.77       | 0.97       | 0.82              | 0.12 | 0   | 0    | 0   | 0          | 0  |
| 871      | ILMN_173029 | ATP1B1     | ATPase, Na+/K    | 1        | 1.014      | 0.001        | 0.000   | -0.28  | 0.35   | -0.05  | -0.14         | -0.51     | 0.36     | 0.25     | 0.87     | 0.65            | 0.10        | 0.48       | 0.72       | 0.98       | 0.89              | 0.16 | 0   | 0    | 0   | 0          | 0  |
| 879      | ILMN_181566 | ATP2A2     | ATPase, Ca++     | 12       | 1.105      | 0.000        | 0.000   | 0.16   | 0.03   | 0.04   | 0.16          | 0.39      | 0.15     | 0.78     | 0.75     | 0.14            | 0.00        | 0.24       | 0.97       | 0.96       | 0.55              | 0.00 | 0   | 0    | 0   | 0          | 0  |
| 976      | ILMN_168095 | AURKA      | aurora kinase    | 20       | 1.173      | 0.000        | 0.000   | -0.07  | 0.16   | 0.07   | 0.01          | 0.00      | 0.54     | 0.18     | 0.56     | 0.96            | 0.99        | 0.64       | 0.64       | 0.91       | 0.99              | 1.00 | 0   | 0    | 0   | 0          | 0  |
| 977      | ILMN_235743 | AURKA      | aurora kinase    | 20       | 1.114      | 0.000        | 0.000   | -0.06  | 0.15   | 0.08   | -0.02         | 0.02      | 0.58     | 0.18     | 0.49     | 0.89            | 0.85        | 0.68       | 0.64       | 0.89       | 0.97              | 0.89 | 0   | 0    | 0   | 0          | 0  |
| 979      | ILMN_168421 | AURKB      | aurora kinase l  | 17       | 1.198      | 0.000        | 0.000   | -0.19  | -0.57  | -0.01  | -0.43         | -0.39     | 0.34     | 0.01     | 0.97     | 0.03            | 0.05        | 0.46       | 0.09       | 1.00       | 0.35              | 0.09 | 0   | 0    | 0   | 0          | 0  |
| 985      | ILMN_170187 | AXL        | AXL receptor t   | 19       | -1.134     | 0.000        | 0.000   | 1.29   | 0.06   | -0.06  | 0.39          | 1.39      | 0.00     | 0.83     | 0.80     | 0.13            | 0.00        | 0.00       | 0.98       | 0.97       | 0.53              | 0.00 | 1   | 0    | 0   | 0          | 1  |
| 986      | ILMN_236452 | AXL        | AXL receptor t   | 19       | -1.004     | 0.000        | 0.000   | 1.19   | 0.04   | 0.16   | 0.43          | 1.52      | 0.00     | 0.87     | 0.52     | 0.09            | 0.00        | 0.00       | 0.98       | 0.90       | 0.48              | 0.00 | 1   | 0    | 0   | 0          | 1  |
| 1031     | ILMN_169141 | BAMBI      | BMP and activi   | 10       | -1.021     | 0.000        | 0.000   | 0.32   | -0.12  | 0.60   | 0.32          | 0.25      | 0.22     | 0.64     | 0.03     | 0.23            | 0.33        | 0.32       | 0.93       | 0.38       | 0.64              | 0.43 | 0   | 0    | 0   | 0          | 0  |
| 1062     | ILMN_176761 | BBS2       | Bardet-Biedl s   | 16       | -1.006     | 0.000        | 0.000   | 0.11   | -0.13  | 0.02   | -0.10         | 0.18      | 0.34     | 0.24     | 0.84     | 0.37            | 0.11        | 0.45       | 0.71       | 0.98       | 0.74              | 0.18 | 0   | 0    | 0   | 0          | 0  |
| 1074     | ILMN_176363 | BCAR3      | breast cancer    | 1        | -1.167     | 0.000        | 0.000   | -0.66  | 0.89   | 0.01   | -0.25         | -1.00     | 0.02     | 0.00     | 0.98     | 0.34            | 0.00        | 0.04       | 0.04       | 1.00       | 0.72              | 0.00 | 0   | 0    | 0   | 0          | -1 |
| 1092     | ILMN_224695 | BCL2       | B-cell CLL/lym   | 18       | -1.005     | 0.000        | 0.000   | -0.13  | -0.36  | 0.08   | -0.11         | -0.08     | 0.34     | 0.01     | 0.56     | 0.41            | 0.53        | 0.45       | 0.12       | 0.92       | 0.77              | 0.62 | 0   | 0    | 0   | 0          | 0  |
| 1240     | ILMN_170506 | BTBD11     | BTB (POZ) don    | 12       | 1.091      | 0.000        | 0.000   | 0.90   | -0.26  | 0.22   | 0.30          | 0.93      | 0.00     | 0.22     | 0.32     | 0.17            | 0.00        | 0.00       | 0.69       | 0.80       | 0.58              | 0.00 | 0   | 0    | 0   | 0          | 0  |
| 1283     | ILMN_176755 | C10orf10   | chromosome 1     | 10       | -1.278     | 0.000        | 0.000   | -0.39  | -0.41  | 0.11   | 0.00          | -0.24     | 0.02     | 0.02     | 0.50     | 0.99            | 0.14        | 0.05       | 0.19       | 0.89       | 1.00              | 0.21 | 0   | 0    | 0   | 0          | 0  |
| 1306     | ILMN_171020 | C10orf6    | chromosome 1     | 10       | -1.405     | 0.000        | 0.000   | -0.68  | 0.11   | -0.21  | -0.29         | -0.97     | 0.00     | 0.49     | 0.18     | 0.06            | 0.00        | 0.00       | 0.88       | 0.70       | 0.42              | 0.00 | 0   | 0    | 0   | 0          | 0  |
| 1378     | ILMN_165849 | C13orf15   | chromosome 1     | 13       | -1.146     | 0.000        | 0.000   | -1.37  | -0.23  | 0.24   | -0.32         | -2.07     | 0.01     | 0.65     | 0.62     | 0.52            | 0.00        | 0.02       | 0.93       | 0.94       | 0.83              | 0.00 | -1  | 0    | 0   | 0          | -1 |
| 1459     | ILMN_180541 | C15orf48   | chromosome 1     | 15       | 1.391      | 0.000        | 0.000   | 1.12   | -0.25  | 0.95   | 0.87          | 1.29      | 0.00     | 0.19     | 0.00     | 0.00            | 0.00        | 0.00       | 0.65       | 0.01       | 0.01              | 0.00 | 1   | 0    | 0   | 0          | 1  |
| 1460     | ILMN_165469 | C15orf48   | chromosome 1     | 15       | 1.255      | 0.000        | 0.000   | 1.88   | -0.22  | 1.12   | 1.23          | 2.34      | 0.00     | 0.51     | 0.00     | 0.00            | 0.00        | 0.00       | 0.88       | 0.12       | 0.07              | 0.00 | 1   | 0    | 0   | 1          | 1  |
| 1586     | ILMN_167481 | C1orf115   | chromosome 1     | 1        | -1.118     | 0.000        | 0.000   | -0.13  | 0.29   | 0.13   | -0.25         | -0.08     | 0.49     | 0.13     | 0.48     | 0.18            | 0.65        | 0.61       | 0.55       | 0.88       | 0.59              | 0.73 | 0   | 0    | 0   | 0          | 0  |
| 1686     | ILMN_228338 | C20orf24   | chromosome 2     | 20       | 1.324      | 0.000        | 0.000   | -0.15  | -0.02  | -0.04  | 0.10          | -0.08     | 0.31     | 0.88     | 0.80     | 0.50            | 0.50        | 0.43       | 0.99       | 0.97       | 0.81              | 0.67 | 0   | 0    | 0   | 0          | 0  |
| 1694     | ILMN_172816 | C20orf45   | chromosome 2     | 20       | 1.138      | 0.000        | 0.000   | 0.34   | 0.09   | 0.12   | 0.11          | 0.44      | 0.00     | 0.43     | 0.27     | 0.30            | 0.00        | 0.01       | 0.84       | 0.77       | 0.69              | 0.00 | 0   | 0    | 0   | 0          | 0  |
| 1853     | ILMN_214884 | C6orf166   | chromosome 6     | 6        | 1.186      | 0.000        | 0.000   | 0.38   | 0.10   | 0.07   | 0.00          | 0.34      | 0.00     | 0.37     | 0.55     | 0.98            | 0.00        | 0.01       | 0.81       | 0.91       | 1.00              | 0.01 | 0   | 0    | 0   | 0          | 0  |
| 1897     | ILMN_167260 | C7orf41    | chromosome 7     | 7        | -1.263     | 0.000        | 0.000   | -      |        |        |               |           |          |          |          |                 |             |            |            |            |                   |      |     |      |     |            |    |

Table S2.xls

|      |             |          |                     |        |        |       |       |       |       |       |       |       |      |      |      |      |      |      |      |      |      |      |      |   |   |    |   |
|------|-------------|----------|---------------------|--------|--------|-------|-------|-------|-------|-------|-------|-------|------|------|------|------|------|------|------|------|------|------|------|---|---|----|---|
| 2216 | ILMN_177296 | CCL8     | chemokine (C-       | 17     | 1.181  | 0.002 | 0.000 | 4.19  | 0.63  | 0.43  | 2.52  | 4.79  | 0.00 | 0.43 | 0.59 | 0.00 | 0.00 | 0.85 | 0.92 | 0.14 | 0.00 | 1    | 0    | 0 | 0 | 1  |   |
| 2220 | ILMN_178612 | CCNA2    | cyclin A2 (CCN      | 4      | 1.146  | 0.000 | 0.000 | -0.21 | -0.56 | 0.16  | -0.36 | -0.28 | 0.28 | 0.00 | 0.40 | 0.07 | 0.15 | 0.40 | 0.09 | 0.85 | 0.44 | 0.22 | 0    | 0 | 0 | 0  |   |
| 2224 | ILMN_180193 | CCNB2    | cyclin B2 (CCN      | 15     | 1.348  | 0.000 | 0.000 | -0.77 | -0.39 | -0.05 | -0.50 | -1.00 | 0.00 | 0.07 | 0.81 | 0.02 | 0.00 | 0.00 | 0.42 | 0.97 | 0.30 | 0.00 | 0    | 0 | 0 | -1 |   |
| 2236 | ILMN_237442 | CCNE1    | cyclin E1 (CCN      | 19     | 1.646  | 0.000 | 0.000 | -0.32 | 0.13  | 0.07  | -0.24 | -0.42 | 0.01 | 0.31 | 0.58 | 0.06 | 0.00 | 0.03 | 0.77 | 0.92 | 0.41 | 0.00 | 0    | 0 | 0 | 0  |   |
| 2264 | ILMN_168937 | CCRN4L   | CCR4 carbon c       | 4      | 1.376  | 0.000 | 0.000 | 0.59  | 0.96  | 0.11  | 0.20  | 0.92  | 0.03 | 0.00 | 0.69 | 0.46 | 0.00 | 0.06 | 0.02 | 0.95 | 0.79 | 0.00 | 0    | 0 | 0 | 0  |   |
| 2316 | ILMN_234122 | CD34     | CD34 molecule       | 1      | -1.322 | 0.000 | 0.000 | 0.43  | 0.04  | 0.17  | 0.27  | 0.51  | 0.00 | 0.75 | 0.16 | 0.03 | 0.00 | 0.00 | 0.96 | 0.68 | 0.34 | 0.00 | 0    | 0 | 0 | 0  |   |
| 2317 | ILMN_173279 | CD34     | CD34 antigen (      | 1      | -1.431 | 0.000 | 0.000 | 0.28  | -0.12 | 0.09  | 0.21  | 0.43  | 0.05 | 0.39 | 0.53 | 0.14 | 0.00 | 0.09 | 0.82 | 0.91 | 0.54 | 0.01 | 0    | 0 | 0 | 0  |   |
| 2318 | ILMN_178486 | CD36     | CD36 molecule       | 7      | 1.118  | 0.015 | 0.000 | -1.40 | -0.07 | -0.44 | -0.45 | -1.65 | 0.00 | 0.81 | 0.17 | 0.16 | 0.00 | 0.00 | 0.97 | 0.70 | 0.57 | 0.00 | -1   | 0 | 0 | -1 |   |
| 2359 | ILMN_178058 | CD83     | CD83 molecule       | 6      | 1.130  | 0.000 | 0.000 | 0.17  | 0.38  | 0.41  | 0.19  | 0.31  | 0.47 | 0.12 | 0.09 | 0.43 | 0.19 | 0.58 | 0.54 | 0.56 | 0.78 | 0.27 | 0    | 0 | 0 | 0  |   |
| 2382 | ILMN_174791 | CDC2     | cell division cy    | 10     | 1.344  | 0.000 | 0.000 | -0.31 | -0.61 | 0.14  | -0.36 | -0.34 | 0.17 | 0.01 | 0.54 | 0.11 | 0.13 | 0.26 | 0.13 | 0.91 | 0.51 | 0.20 | 0    | 0 | 0 | 0  |   |
| 2383 | ILMN_166339 | CDC20    | cell division cy    | 1      | 1.615  | 0.000 | 0.000 | -0.52 | -0.54 | 0.05  | -0.48 | -0.74 | 0.05 | 0.04 | 0.86 | 0.07 | 0.01 | 0.10 | 0.33 | 0.98 | 0.44 | 0.01 | 0    | 0 | 0 | 0  |   |
| 2408 | ILMN_167023 | CDC45L   | CDC45 cell divi     | 22     | 1.098  | 0.000 | 0.000 | -0.40 | -0.56 | 0.21  | -0.29 | -0.47 | 0.09 | 0.02 | 0.36 | 0.22 | 0.05 | 0.16 | 0.21 | 0.83 | 0.63 | 0.09 | 0    | 0 | 0 | 0  |   |
| 2412 | ILMN_168345 | CDCA5    | cell division cy    | 11     | 1.291  | 0.000 | 0.000 | -0.49 | -0.80 | -0.02 | -0.45 | -0.75 | 0.03 | 0.00 | 0.91 | 0.05 | 0.00 | 0.07 | 0.03 | 0.99 | 0.40 | 0.01 | 0    | 0 | 0 | 0  |   |
| 2431 | ILMN_173092 | CDK5R1   | cyclin-depende      | 17     | 1.588  | 0.000 | 0.000 | -0.32 | -0.25 | -0.10 | -0.08 | -0.40 | 0.00 | 0.01 | 0.29 | 0.39 | 0.00 | 0.01 | 0.16 | 0.79 | 0.76 | 0.00 | 0    | 0 | 0 | 0  |   |
| 2492 | ILMN_176300 | CENTA2   | centaurin, alph     | 17     | 1.625  | 0.000 | 0.000 | 0.39  | -0.19 | -0.22 | -0.04 | 0.32  | 0.02 | 0.24 | 0.17 | 0.78 | 0.05 | 0.04 | 0.71 | 0.69 | 0.94 | 0.08 | 0    | 0 | 0 | 0  |   |
| 2513 | ILMN_174701 | CEP55    | centrosomal or      | 10     | 1.113  | 0.000 | 0.000 | -0.21 | -0.39 | 0.07  | -0.25 | -0.39 | 0.29 | 0.06 | 0.73 | 0.21 | 0.06 | 0.41 | 0.38 | 0.96 | 0.62 | 0.10 | 0    | 0 | 0 | 0  |   |
| 2523 | ILMN_235994 | CES1     | carboxylestera      | 16     | -1.129 | 0.001 | 0.000 | 0.07  | -0.99 | 0.10  | -0.16 | 0.01  | 0.89 | 0.04 | 0.83 | 0.74 | 0.99 | 0.92 | 0.31 | 0.98 | 0.92 | 0.99 | 0    | 0 | 0 | 0  |   |
| 2530 | ILMN_177428 | CFB      | complement fa       | 6      | 1.383  | 0.000 | 0.000 | 5.15  | 0.53  | 1.25  | 2.46  | 5.97  | 0.00 | 0.38 | 0.04 | 0.00 | 0.00 | 0.00 | 0.82 | 0.44 | 0.03 | 0.00 | 1    | 0 | 0 | 1  |   |
| 2533 | ILMN_181091 | CFH      | complement fa       | 1      | -1.208 | 0.000 | 0.000 | 0.59  | -0.04 | -0.01 | -0.03 | 0.60  | 0.01 | 0.86 | 0.96 | 0.90 | 0.01 | 0.02 | 0.98 | 1.00 | 0.98 | 0.02 | 0    | 0 | 0 | 0  |   |
| 2534 | ILMN_241219 | CFH      | complement fa       | 1      | -1.332 | 0.000 | 0.000 | 0.41  | 0.00  | 0.06  | 0.00  | 0.41  | 0.03 | 0.98 | 0.74 | 0.99 | 0.03 | 0.06 | 1.00 | 0.96 | 1.00 | 0.05 | 0    | 0 | 0 | 0  |   |
| 2535 | ILMN_165780 | CFH      | complement fa       | 1      | -1.419 | 0.000 | 0.000 | 0.18  | 0.06  | 0.02  | 0.02  | 0.32  | 0.13 | 0.58 | 0.88 | 0.84 | 0.01 | 0.22 | 0.91 | 0.98 | 0.96 | 0.02 | 0    | 0 | 0 | 0  |   |
| 2543 | ILMN_173022 | CGNL1    | cingulin-like 1     | 15     | -1.499 | 0.000 | 0.000 | 1.22  | -0.18 | 0.14  | 0.19  | 1.52  | 0.00 | 0.46 | 0.56 | 0.43 | 0.00 | 0.00 | 0.86 | 0.92 | 0.78 | 0.00 | 1    | 0 | 0 | 1  |   |
| 2575 | ILMN_232627 | CHI3L2   | chitinase 3-like    | 1      | 2.297  | 0.000 | 0.000 | 1.65  | 0.07  | 0.01  | 0.52  | 2.05  | 0.00 | 0.86 | 0.98 | 0.19 | 0.00 | 0.00 | 0.98 | 1.00 | 0.59 | 0.00 | 1    | 0 | 0 | 1  |   |
| 2641 | ILMN_179089 | CKAP4    | cytoskeleton-a      | 12     | 1.058  | 0.000 | 0.000 | 1.52  | -0.34 | 0.34  | 0.48  | 1.82  | 0.00 | 0.19 | 0.98 | 0.16 | 0.00 | 0.34 | 0.00 | 0.65 | 0.70 | 0.43 | 0.00 | 1 | 0 | 0  | 1 |
| 2648 | ILMN_207229 | CKS2     | CDC28 protein       | 9      | 1.176  | 0.000 | 0.000 | -0.25 | -0.03 | 0.08  | -0.09 | -0.46 | 0.13 | 0.83 | 0.61 | 0.56 | 0.01 | 0.21 | 0.98 | 0.93 | 0.85 | 0.01 | 0    | 0 | 0 | 0  |   |
| 2649 | ILMN_175632 | CKS2     | CDC28 protein       | 9      | 1.460  | 0.000 | 0.000 | -0.16 | -0.05 | 0.06  | 0.04  | -0.27 | 0.33 | 0.76 | 0.70 | 0.82 | 0.09 | 0.44 | 0.96 | 0.95 | 0.95 | 0.15 | 0    | 0 | 0 | 0  |   |
| 2655 | ILMN_166083 | CLCN3    | chloride chann      | 4      | 1.067  | 0.000 | 0.000 | -0.33 | -0.06 | -0.12 | -0.10 | -0.42 | 0.00 | 0.59 | 0.26 | 0.33 | 0.00 | 0.01 | 0.91 | 0.76 | 0.72 | 0.00 | 0    | 0 | 0 | 0  |   |
| 2666 | ILMN_172533 | CLDN23   | claudin 23 (CL      | 8      | -1.730 | 0.000 | 0.000 | 0.59  | 0.29  | -0.06 | 0.37  | 0.77  | 0.00 | 0.15 | 0.76 | 0.07 | 0.00 | 0.01 | 0.60 | 0.96 | 0.44 | 0.00 | 0    | 0 | 0 | 0  |   |
| 2728 | ILMN_170989 | CLPX     | CipX caseinoly      | 15     | 1.052  | 0.000 | 0.000 | 0.05  | 0.09  | 0.02  | 0.03  | 0.12  | 0.48 | 0.25 | 0.77 | 0.67 | 0.13 | 0.59 | 0.72 | 0.96 | 0.90 | 0.19 | 0    | 0 | 0 | 0  |   |
| 2743 | ILMN_170408 | CMAH     | cytidine monor      | 6      | -1.193 | 0.000 | 0.000 | 0.40  | 0.12  | 0.03  | -0.09 | 0.52  | 0.00 | 0.26 | 0.80 | 0.37 | 0.00 | 0.00 | 0.73 | 0.97 | 0.74 | 0.00 | 0    | 0 | 0 | 0  |   |
| 2774 | ILMN_165572 | CNNM4    | cyclin M4 (CNN      | 2      | 1.034  | 0.000 | 0.000 | 0.19  | -0.01 | 0.10  | 0.11  | 0.12  | 0.12 | 0.94 | 0.38 | 0.37 | 0.32 | 0.20 | 0.99 | 0.84 | 0.74 | 0.42 | 0    | 0 | 0 | 0  |   |
| 2798 | ILMN_171188 | COBL     | cordon-bleu hc      | 7      | -1.222 | 0.000 | 0.000 | 0.18  | 0.42  | 0.35  | 0.44  | 0.38  | 0.35 | 0.03 | 0.07 | 0.03 | 0.05 | 0.47 | 0.28 | 0.52 | 0.32 | 0.09 | 0    | 0 | 0 | 0  |   |
| 2822 | ILMN_167405 | COL8A2   | collagen, type      | 1      | -1.061 | 0.000 | 0.000 | -0.96 | -0.41 | 0.53  | -0.19 | -1.13 | 0.01 | 0.23 | 0.12 | 0.58 | 0.00 | 0.02 | 0.69 | 0.63 | 0.86 | 0.00 | 0    | 0 | 0 | -1 |   |
| 2887 | ILMN_166241 | COX7A1   | cytochrome c c      | 19     | -1.328 | 0.000 | 0.000 | -0.07 | 0.13  | 0.05  | -0.10 | -0.10 | 0.52 | 0.23 | 0.62 | 0.35 | 0.39 | 0.63 | 0.70 | 0.94 | 0.73 | 0.49 | 0    | 0 | 0 | 0  |   |
| 2928 | ILMN_169017 | CRABP2   | cellular retinoi    | 1      | 1.856  | 0.000 | 0.000 | -1.63 | 0.17  | -0.07 | -0.33 | -2.11 | 0.01 | 0.77 | 0.91 | 0.56 | 0.00 | 0.02 | 0.96 | 0.99 | 0.85 | 0.00 | -1   | 0 | 0 | -1 |   |
| 2931 | ILMN_173799 | CRAT     | carnitine acety     | 9      | -1.380 | 0.000 | 0.000 | 0.20  | -0.28 | 0.04  | 0.08  | 0.25  | 0.13 | 0.04 | 0.79 | 0.57 | 0.06 | 0.22 | 0.31 | 0.97 | 0.85 | 0.11 | 0    | 0 | 0 | 0  |   |
| 2950 | ILMN_165692 | CRIP1    | cysteine-rich p     | 14     | -1.581 | 0.000 | 0.000 | -0.72 | 0.13  | -0.17 | 0.04  | -0.65 | 0.08 | 0.75 | 0.66 | 0.92 | 0.11 | 0.14 | 0.96 | 0.94 | 0.98 | 0.17 | 0    | 0 | 0 | 0  |   |
| 2977 | ILMN_179618 | CRY2     | cryptochrome .      | 11     | -1.370 | 0.000 | 0.000 | 0.27  | 0.02  | 0.10  | 0.01  | 0.31  | 0.01 | 0.84 | 0.32 | 0.92 | 0.00 | 0.03 | 0.98 | 0.80 | 0.98 | 0.01 | 0    | 0 | 0 | 0  |   |
| 3002 | ILMN_237645 | CSF2RA   | colony stimulat     | 11     | 1.113  | 0.000 | 0.000 | 0.08  | 0.09  | 0.25  | -0.02 | 0.17  | 0.69 | 0.67 | 0.22 | 0.93 | 0.41 | 0.77 | 0.94 | 0.74 | 0.98 | 0.51 | 0    | 0 | 0 | 0  |   |
| 3032 | ILMN_181192 | CSRP1    | cysteine and g      | 1      | -1.200 | 0.000 | 0.000 | -0.52 | -0.27 | -0.06 | -0.20 | -0.54 | 0.00 | 0.06 | 0.68 | 0.15 | 0.00 | 0.00 | 0.38 | 0.95 | 0.56 | 0.00 | 0    | 0 | 0 | 0  |   |
| 3036 | ILMN_169866 | CST6     | cystatin E/M (C     | 11     | -1.133 | 0.000 | 0.000 | -0.54 | -0.05 | -0.11 | -0.09 | -0.41 | 0.00 | 0.76 | 0.54 | 0.60 | 0.02 | 0.01 | 0.96 | 0.91 | 0.86 | 0.05 | 0    | 0 | 0 | 0  |   |
| 3037 | ILMN_169773 | CST6     | PREDICTED: cystatin | -1.126 | 0.001  | 0.000 | -0.34 | -0.02 | -0.09 | -0.14 | -0.31 | 0.03  | 0.87 | 0.56 | 0.36 | 0.04 | 0.07 | 0.98 | 0.91 | 0.73 | 0.08 | 0    | 0    | 0 | 0 | 0  |   |
| 3040 | ILMN_166988 | CSTA     | cystatin A (ste     | 3      | 1.821  | 0.000 | 0.000 | -0.08 | -0.36 | 0.09  | -0.06 | 0.03  | 0.60 | 0.03 | 0.55 | 0.68 | 0.84 | 0.70 | 0.24 | 0.91 | 0.90 | 0.88 | 0    | 0 | 0 | 0  |   |
| 3041 | ILMN_176179 | CSTB     | cystatin B (ste     | 21     | 1.151  | 0.000 | 0.000 | -0.53 | 0.00  | -0.12 | -0.16 | -0.73 | 0.00 | 0.98 | 0.30 | 0.17 | 0.00 | 0.00 | 1.00 | 0.79 | 0.58 | 0.00 | 0    | 0 | 0 | 0  |   |
| 3071 | ILMN_168810 | CTNBP1P1 | catenin, beta ii    | 1      | -1.262 | 0.000 | 0.000 | -0.70 | -0.16 | -0.16 | 0.01  | -0.79 | 0.00 | 0.46 | 0.47 | 0.97 | 0.00 | 0.01 | 0.86 | 0.88 | 0.99 | 0.00 | 0    | 0 | 0 | 0  |   |
| 3086 | ILMN_224246 | CTSC     | cathepsin C (C      | 11     | 1.188  | 0.000 | 0.000 | -0.46 | 0.98  | -0.32 | -0.25 | -0.25 | 0.11 | 0.00 | 0.26 | 0.38 | 0.38 | 0.18 | 0.03 | 0.76 | 0.75 | 0.48 | 0    | 0 | 0 | 0  |   |
| 3087 | ILMN_169634 | CTSC     | cathepsin C (C      | 11     | 1.299  | 0.000 | 0.000 | -0.50 | 1.06  | -0.41 | -0.29 | -0.27 | 0.09 | 0.00 | 0.17 | 0.33 | 0.35 | 0.15 | 0.02 | 0.69 | 0.71 | 0.45 | 0    | 1 | 0 | 0  |   |
| 3100 | ILMN_166626 | CTS2     | cathepsin Z (C      | 20     | -1.060 | 0.000 | 0.000 | -0.42 | 0.04  | -0.22 | -0.19 | -0.41 | 0.01 | 0.79 | 0.17 | 0.24 | 0.01 | 0.03 | 0.97 | 0.69 | 0.64 | 0.03 | 0    | 0 | 0 | 0  |   |
| 3127 | ILMN_179175 | CXCL10   | chemokine (C-       | 4      | 1.559  | 0.000 | 0.000 | 6.34  | 0.04  | 0.49  | 1.82  | 7.22  | 0.00 | 0.96 | 0.48 | 0.01 | 0.00 | 0.00 | 1.00 | 0.89 | 0.25 | 0.00 | 1    | 0 | 0 | 1  |   |
| 3136 | ILMN_174535 | CXCL9    | chemokine (C-       | 4      | 1.467  | 0.001 | 0.000 | 6.94  | 0.50  | 0.51  | 1.30  | 6.95  | 0.00 | 0.35 | 0.35 | 0.02 | 0.00 | 0.00 | 0.80 | 0.82 | 0.30 | 0.00 | 1    | 0 | 0 | 1  |   |
| 3174 | ILMN_171230 | CYBRD1   | cytochrome b i      | 2      | -1.215 | 0.000 | 0.000 | -1.46 | -0.09 | -0.53 | -0.72 | -1.61 | 0.00 | 0.75 | 0.06 | 0.01 | 0.00 | 0.00 | 0.96 | 0.49 | 0.26 | 0.00 | -1   | 0 | 0 | -1 |   |
| 3175 |             |          |                     |        |        |       |       |       |       |       |       |       |      |      |      |      |      |      |      |      |      |      |      |   |   |    |   |

Table S2.xls

|      |             |           |                   |    |        |       |       |       |       |       |       |       |      |      |      |      |      |      |      |      |      |      |    |    |   |   |    |
|------|-------------|-----------|-------------------|----|--------|-------|-------|-------|-------|-------|-------|-------|------|------|------|------|------|------|------|------|------|------|----|----|---|---|----|
| 3905 | ILMN_170974 | ENDOGL1   | endonuclease (    | 3  | 1.051  | 0.000 | 0.000 | 3.21  | -0.75 | 1.12  | 2.01  | 3.45  | 0.00 | 0.06 | 0.01 | 0.00 | 0.00 | 0.00 | 0.39 | 0.23 | 0.00 | 0.00 | 1  | 0  | 0 | 1 | 1  |
| 3935 | ILMN_167579 | EPDR1     | ependymin rel     | 7  | -1.279 | 0.000 | 0.000 | -0.48 | 0.55  | -0.25 | -0.43 | -0.55 | 0.01 | 0.01 | 0.18 | 0.02 | 0.00 | 0.03 | 0.09 | 0.70 | 0.32 | 0.01 | 0  | 0  | 0 | 0 | 0  |
| 3949 | ILMN_238854 | EPST11    | epithelial stron  | 13 | 2.419  | 0.000 | 0.000 | 3.66  | -0.01 | -0.31 | 1.75  | 4.01  | 0.00 | 0.97 | 0.37 | 0.00 | 0.00 | 0.00 | 1.00 | 0.83 | 0.00 | 0.00 | 1  | 0  | 0 | 1 | 1  |
| 3982 | ILMN_174496 | ER01L     | ER01-like (S, c   | 14 | 1.348  | 0.000 | 0.000 | 0.49  | 0.20  | 0.20  | 0.26  | 0.63  | 0.00 | 0.16 | 0.16 | 0.07 | 0.00 | 0.00 | 0.61 | 0.68 | 0.45 | 0.00 | 0  | 0  | 0 | 0 | 0  |
| 4066 | ILMN_167176 | F12       | coagulation fac   | 5  | 1.051  | 0.000 | 0.000 | -0.39 | 0.07  | 0.11  | -0.05 | -0.43 | 0.00 | 0.58 | 0.39 | 0.70 | 0.00 | 0.01 | 0.91 | 0.84 | 0.91 | 0.00 | 0  | 0  | 0 | 0 | 0  |
| 4069 | ILMN_212957 | F3        | coagulation fac   | 1  | -1.489 | 0.000 | 0.000 | -0.48 | -0.10 | 0.79  | 0.10  | -0.81 | 0.17 | 0.78 | 0.03 | 0.78 | 0.02 | 0.26 | 0.96 | 0.38 | 0.93 | 0.05 | 0  | 0  | 0 | 0 | 0  |
| 4075 | ILMN_177300 | FABP4     | fatty acid bindi  | 8  | -1.909 | 0.000 | 0.000 | -1.05 | 1.53  | -0.72 | -0.75 | -1.22 | 0.04 | 0.00 | 0.16 | 0.14 | 0.02 | 0.09 | 0.08 | 0.68 | 0.55 | 0.04 | -1 | 1  | 0 | 0 | -1 |
| 4076 | ILMN_214676 | FABP5     | fatty acid bindi  | 8  | 2.021  | 0.000 | 0.000 | -1.54 | 0.45  | -0.58 | -0.44 | -1.60 | 0.00 | 0.17 | 0.08 | 0.18 | 0.00 | 0.00 | 0.63 | 0.55 | 0.59 | 0.00 | -1 | 0  | 0 | 0 | -1 |
| 4077 | ILMN_169630 | FABP5     | fatty acid bindi  | 8  | 2.927  | 0.000 | 0.000 | -1.27 | 0.59  | -0.55 | -0.31 | -1.32 | 0.00 | 0.06 | 0.08 | 0.32 | 0.00 | 0.00 | 0.40 | 0.55 | 0.71 | 0.00 | -1 | 0  | 0 | 0 | -1 |
| 4079 | ILMN_167013 | FADS1     | fatty acid desa   | 11 | -2.329 | 0.000 | 0.000 | -0.34 | 0.21  | 0.17  | 0.11  | -0.25 | 0.11 | 0.33 | 0.42 | 0.61 | 0.24 | 0.20 | 0.79 | 0.86 | 0.87 | 0.33 | 0  | 0  | 0 | 0 | 0  |
| 4080 | ILMN_207506 | FADS2     | fatty acid desa   | 11 | -1.083 | 0.000 | 0.000 | -0.14 | -0.02 | -0.01 | -0.03 | 0.01  | 0.38 | 0.88 | 0.93 | 0.85 | 0.93 | 0.49 | 0.99 | 0.99 | 0.96 | 0.95 | 0  | 0  | 0 | 0 | 0  |
| 4105 | ILMN_175867 | FAM107B   | family with sec   | 10 | -1.019 | 0.000 | 0.000 | -0.16 | -0.62 | 0.23  | 0.06  | -0.47 | 0.42 | 0.00 | 0.23 | 0.75 | 0.02 | 0.54 | 0.05 | 0.74 | 0.93 | 0.04 | 0  | 0  | 0 | 0 | 0  |
| 4152 | ILMN_238795 | FAM134B   | family with sec   | 5  | -1.242 | 0.000 | 0.000 | -0.24 | -1.07 | 0.01  | -0.04 | -0.22 | 0.15 | 0.00 | 0.95 | 0.82 | 0.19 | 0.24 | 0.00 | 0.99 | 0.95 | 0.27 | 0  | -1 | 0 | 0 | 0  |
| 4156 | ILMN_240125 | FAM13A1   | family with sec   | 4  | -1.063 | 0.000 | 0.000 | -0.29 | -0.08 | -0.40 | -0.22 | -0.28 | 0.11 | 0.65 | 0.03 | 0.23 | 0.12 | 0.19 | 0.94 | 0.40 | 0.64 | 0.19 | 0  | 0  | 0 | 0 | 0  |
| 4157 | ILMN_175251 | FAM13A1   | family with sec   | 4  | -1.084 | 0.000 | 0.000 | -0.39 | -0.20 | -0.47 | -0.31 | -0.51 | 0.05 | 0.32 | 0.02 | 0.12 | 0.01 | 0.10 | 0.78 | 0.36 | 0.53 | 0.03 | 0  | 0  | 0 | 0 | 0  |
| 4194 | ILMN_170601 | FAM43A    | family with sec   | 3  | 1.885  | 0.000 | 0.000 | -0.32 | -0.37 | -0.23 | -0.16 | -0.40 | 0.01 | 0.00 | 0.05 | 0.17 | 0.00 | 0.02 | 0.05 | 0.47 | 0.58 | 0.00 | 0  | 0  | 0 | 0 | 0  |
| 4269 | ILMN_172879 | FBP1      | fructose-1,6-bi   | 9  | -1.079 | 0.000 | 0.000 | -1.69 | -0.36 | 0.09  | -0.90 | -1.99 | 0.00 | 0.41 | 0.84 | 0.04 | 0.00 | 0.00 | 0.84 | 0.98 | 0.38 | 0.00 | -1 | 0  | 0 | 0 | -1 |
| 4309 | ILMN_174711 | FBXO46    | PREDICTED: F      | 19 | 1.045  | 0.000 | 0.000 | 0.10  | -0.03 | -0.03 | -0.02 | 0.09  | 0.30 | 0.73 | 0.78 | 0.88 | 0.36 | 0.41 | 0.95 | 0.97 | 0.97 | 0.46 | 0  | 0  | 0 | 0 | 0  |
| 4312 | ILMN_170145 | FBXO6     | F-box protein (   | 1  | 1.270  | 0.000 | 0.000 | 1.71  | 0.33  | 0.16  | 0.87  | 2.06  | 0.00 | 0.16 | 0.49 | 0.00 | 0.00 | 0.00 | 0.60 | 0.89 | 0.06 | 0.00 | 1  | 0  | 0 | 0 | 1  |
| 4368 | ILMN_169529 | FERMT2    | fermitin family   | 14 | -1.347 | 0.000 | 0.000 | 0.64  | -0.09 | 0.29  | 0.40  | 0.85  | 0.00 | 0.61 | 0.09 | 0.02 | 0.00 | 0.00 | 0.92 | 0.57 | 0.31 | 0.00 | 0  | 0  | 0 | 0 | 0  |
| 4378 | ILMN_177268 | FGD3      | FYVE, RhoGEF      | 9  | 1.054  | 0.000 | 0.000 | 0.75  | -0.50 | 0.07  | 0.03  | 0.79  | 0.00 | 0.02 | 0.73 | 0.88 | 0.00 | 0.00 | 0.19 | 0.96 | 0.97 | 0.00 | 0  | 0  | 0 | 0 | 0  |
| 4380 | ILMN_210414 | FGD5      | FYVE, RhoGEF      | 3  | -1.202 | 0.000 | 0.000 | -1.08 | -0.01 | -0.13 | -0.55 | -1.21 | 0.00 | 0.97 | 0.60 | 0.03 | 0.00 | 0.00 | 1.00 | 0.93 | 0.35 | 0.00 | -1 | 0  | 0 | 0 | -1 |
| 4392 | ILMN_180584 | FHL1      | four and a half X | 1  | -1.801 | 0.000 | 0.000 | -0.35 | 0.08  | -0.16 | -0.24 | -0.52 | 0.09 | 0.69 | 0.43 | 0.24 | 0.01 | 0.16 | 0.94 | 0.86 | 0.65 | 0.03 | 0  | 0  | 0 | 0 | 0  |
| 4467 | ILMN_167703 | FLJ21986  | hypothetical pr   | 7  | -1.193 | 0.000 | 0.000 | 0.06  | -0.56 | 0.51  | 0.00  | -0.05 | 0.72 | 0.00 | 0.00 | 1.00 | 0.79 | 0.80 | 0.05 | 0.20 | 1.00 | 0.84 | 0  | 0  | 0 | 0 | 0  |
| 4472 | ILMN_170728 | FLJ22662  | hypothetical pr   | 12 | 1.604  | 0.000 | 0.000 | -0.59 | -0.01 | 0.00  | -0.11 | -0.54 | 0.00 | 0.97 | 0.99 | 0.48 | 0.00 | 0.00 | 1.00 | 1.00 | 0.80 | 0.00 | 0  | 0  | 0 | 0 | 0  |
| 4510 | ILMN_220487 | FLVCR2    | feline leukemic   | 14 | 1.262  | 0.000 | 0.000 | -0.64 | 0.27  | -0.12 | 0.00  | -0.57 | 0.00 | 0.12 | 0.48 | 0.99 | 0.00 | 0.00 | 0.54 | 0.89 | 1.00 | 0.01 | 0  | 0  | 0 | 0 | 0  |
| 4570 | ILMN_170008 | FST       | folllistatin (FST | 5  | -1.614 | 0.000 | 0.000 | -0.02 | 0.42  | 0.08  | 0.06  | -0.03 | 0.87 | 0.00 | 0.44 | 0.55 | 0.75 | 0.91 | 0.01 | 0.87 | 0.84 | 0.81 | 0  | 0  | 0 | 0 | 0  |
| 4626 | ILMN_174336 | FZD4      | frizzled homolc   | 11 | -1.441 | 0.000 | 0.000 | 0.32  | -0.25 | 0.59  | 0.15  | 0.37  | 0.06 | 0.14 | 0.00 | 0.35 | 0.03 | 0.11 | 0.58 | 0.09 | 0.73 | 0.06 | 0  | 0  | 0 | 0 | 0  |
| 4644 | ILMN_215128 | GABARAPL1 | GABA(A) recep     | 12 | -1.074 | 0.000 | 0.000 | -0.03 | 0.03  | 0.05  | 0.16  | 0.08  | 0.76 | 0.75 | 0.59 | 0.10 | 0.40 | 0.83 | 0.96 | 0.92 | 0.50 | 0.50 | 0  | 0  | 0 | 0 | 0  |
| 4655 | ILMN_168201 | GAL       | galanin prepro    | 11 | -3.853 | 0.000 | 0.000 | -0.48 | 0.27  | 0.44  | 0.53  | -0.32 | 0.40 | 0.64 | 0.44 | 0.36 | 0.57 | 0.52 | 0.93 | 0.87 | 0.74 | 0.66 | 0  | 0  | 0 | 0 | 0  |
| 4706 | ILMN_175512 | GBA       | glucosidase, be   | 1  | 1.196  | 0.000 | 0.000 | -0.18 | 0.03  | -0.15 | -0.08 | -0.07 | 0.05 | 0.72 | 0.11 | 0.40 | 0.45 | 0.09 | 0.95 | 0.59 | 0.76 | 0.55 | 0  | 0  | 0 | 0 | 0  |
| 4714 | ILMN_214878 | GBP1      | guanylate bind    | 1  | 1.622  | 0.000 | 0.000 | 3.77  | 0.11  | 1.23  | 1.45  | 3.94  | 0.00 | 0.72 | 0.00 | 0.00 | 0.00 | 0.00 | 0.95 | 0.05 | 0.01 | 0.00 | 1  | 0  | 1 | 1 | 1  |
| 4715 | ILMN_170111 | GBP1      | guanylate bind    | 1  | 1.629  | 0.000 | 0.000 | 3.97  | 0.17  | 1.24  | 1.59  | 4.28  | 0.00 | 0.62 | 0.00 | 0.00 | 0.00 | 0.00 | 0.92 | 0.08 | 0.01 | 0.00 | 1  | 0  | 1 | 1 | 1  |
| 4719 | ILMN_211456 | GBP5      | guanylate bind    | 1  | 1.442  | 0.000 | 0.000 | 5.04  | -0.04 | 0.48  | 1.37  | 5.21  | 0.00 | 0.91 | 0.17 | 0.00 | 0.00 | 0.00 | 0.99 | 0.70 | 0.04 | 0.00 | 1  | 0  | 0 | 1 | 1  |
| 4773 | ILMN_219591 | GGH       | gamma-glutar      | 8  | 1.067  | 0.000 | 0.000 | -0.09 | -0.35 | 0.22  | 0.05  | 0.01  | 0.53 | 0.02 | 0.14 | 0.74 | 0.97 | 0.64 | 0.23 | 0.65 | 0.92 | 0.98 | 0  | 0  | 0 | 0 | 0  |
| 4774 | ILMN_168175 | GGH       | gamma-glutar      | 8  | 1.148  | 0.000 | 0.000 | 0.00  | -0.48 | 0.54  | 0.14  | 0.18  | 1.00 | 0.00 | 0.00 | 0.37 | 0.26 | 1.00 | 0.09 | 0.12 | 0.74 | 0.35 | 0  | 0  | 0 | 0 | 0  |
| 4792 | ILMN_175427 | GINS3     | GINS complex      | 16 | 1.102  | 0.000 | 0.000 | 0.16  | -0.10 | 0.15  | 0.08  | 0.10  | 0.06 | 0.23 | 0.08 | 0.33 | 0.24 | 0.12 | 0.70 | 0.53 | 0.71 | 0.33 | 0  | 0  | 0 | 0 | 0  |
| 4801 | ILMN_176938 | GJB2      | gap junction p    | 13 | 2.520  | 0.000 | 0.000 | 0.75  | -1.05 | 0.87  | 0.69  | 1.03  | 0.04 | 0.01 | 0.02 | 0.06 | 0.01 | 0.09 | 0.10 | 0.34 | 0.42 | 0.02 | 0  | -1 | 0 | 0 | 1  |
| 4804 | ILMN_172547 | GK        | glycerol kinase X | 1  | 1.696  | 0.000 | 0.000 | 1.00  | 0.05  | 0.17  | 0.23  | 1.22  | 0.00 | 0.84 | 0.49 | 0.34 | 0.00 | 0.00 | 0.98 | 0.89 | 0.72 | 0.00 | 1  | 0  | 0 | 0 | 1  |
| 4805 | ILMN_239329 | GK        | glycerol kinase X | 1  | 1.757  | 0.000 | 0.000 | 0.97  | 0.16  | 0.24  | 0.33  | 1.16  | 0.00 | 0.54 | 0.35 | 0.20 | 0.00 | 0.00 | 0.89 | 0.82 | 0.61 | 0.00 | 0  | 0  | 0 | 0 | 1  |
| 4838 | ILMN_222104 | GM2A      | GM2 gangliosic    | 5  | 1.845  | 0.000 | 0.000 | -0.24 | 0.07  | 0.19  | 0.03  | -0.26 | 0.14 | 0.66 | 0.25 | 0.87 | 0.11 | 0.22 | 0.94 | 0.75 | 0.97 | 0.17 | 0  | 0  | 0 | 0 | 0  |
| 4850 | ILMN_241292 | GMPPB     | GDP-mannose       | 3  | 1.027  | 0.000 | 0.000 | 0.20  | -0.04 | 0.01  | -0.03 | 0.24  | 0.10 | 0.74 | 0.96 | 0.77 | 0.04 | 0.17 | 0.96 | 1.00 | 0.93 | 0.08 | 0  | 0  | 0 | 0 | 0  |
| 4860 | ILMN_177396 | GNA15     | guanine nuclec    | 19 | 1.234  | 0.000 | 0.000 | 0.69  | -0.07 | 0.17  | 0.18  | 0.86  | 0.00 | 0.76 | 0.46 | 0.45 | 0.00 | 0.01 | 0.96 | 0.88 | 0.79 | 0.00 | 0  | 0  | 0 | 0 | 0  |
| 4921 | ILMN_217885 | GPAM      | glycerol-3-pho    | 10 | -1.398 | 0.000 | 0.000 | -0.55 | -0.09 | -0.09 | -0.02 | -0.62 | 0.00 | 0.47 | 0.51 | 0.87 | 0.00 | 0.00 | 0.87 | 0.90 | 0.97 | 0.00 | 0  | 0  | 0 | 0 | 0  |
| 4922 | ILMN_175821 | GPAM      | glycerol-3-pho    | 10 | -1.246 | 0.001 | 0.000 | -0.53 | -0.09 | -0.10 | -0.11 | -0.62 | 0.00 | 0.37 | 0.33 | 0.31 | 0.00 | 0.00 | 0.81 | 0.81 | 0.70 | 0.00 | 0  | 0  | 0 | 0 | 0  |
| 4934 | ILMN_205197 | GPC3      | glypican 3 (GP X  | 1  | -1.146 | 0.000 | 0.000 | 0.03  | -0.11 | 0.05  | 0.01  | 0.00  | 0.83 | 0.37 | 0.69 | 0.96 | 0.99 | 0.88 | 0.81 | 0.95 | 0.99 | 0.99 | 0  | 0  | 0 | 0 | 0  |
| 4974 | ILMN_167114 | GPR68     | G protein-coup    | 14 | 1.899  | 0.000 | 0.000 | -0.41 | -0.60 | 0.41  | 0.14  | -0.71 | 0.21 | 0.07 | 0.22 | 0.67 | 0.04 | 0.32 | 0.44 | 0.73 | 0.90 | 0.07 | 0  | 0  | 0 | 0 | 0  |
| 5032 | ILMN_180104 | GSN       | gelsolin (amylc   | 9  | -1.093 | 0.000 | 0.000 | -0.98 | 0.10  | 0.32  | -0.23 | -1.18 | 0.00 | 0.74 | 0.29 | 0.43 | 0.00 | 0.01 | 0.96 | 0.78 | 0.78 | 0.00 | 0  | 0  | 0 | 0 | -1 |
| 5044 | ILMN_173618 | GSTM3     | glutathione S-t   | 1  | -1.154 | 0.001 | 0.000 | -0.45 | -0.29 | 0.06  | -0.15 | -0.59 | 0.00 | 0.02 | 0.65 | 0.24 | 0.00 | 0.00 | 0.24 | 0.94 | 0.64 | 0.00 | 0  | 0  | 0 | 0 | 0  |
| 5105 | ILMN_166803 | GYPC      | glycophorin C (   | 2  | -1.097 | 0.000 | 0.000 | 1.90  | -0.36 | 0.92  | 0.64  | 2.17  | 0.00 | 0.13 | 0.00 | 0.01 | 0.00 | 0.00 | 0.56 | 0.05 | 0.22 | 0.00 |    |    |   |   |    |

Table S2.xls

|      |              |                   |                      |       |        |       |       |       |       |       |       |       |      |      |      |      |      |      |      |      |      |      |    |   |   |   |    |
|------|--------------|-------------------|----------------------|-------|--------|-------|-------|-------|-------|-------|-------|-------|------|------|------|------|------|------|------|------|------|------|----|---|---|---|----|
| 5772 | ILMN_1910908 | RST24587 Athersys | RA                   | 2.033 | 0.000  | 0.000 | 1.41  | -0.14 | 0.20  | 0.30  | 1.74  | 0.00  | 0.58 | 0.45 | 0.25 | 0.00 | 0.00 | 0.91 | 0.87 | 0.65 | 0.00 | 1    | 0  | 0 | 0 | 1 |    |
| 5791 | ILMN_238950  | HSD11B1           | hydroxysteroid       | 1     | -1.847 | 0.000 | 0.000 | 1.68  | 0.88  | 0.95  | 1.41  | 2.26  | 0.00 | 0.09 | 0.07 | 0.01 | 0.00 | 0.01 | 0.48 | 0.51 | 0.22 | 0.00 | 1  | 0 | 0 | 0 | 1  |
| 5818 | ILMN_215391  | HSPA2             | heat shock 70k       | 14    | -1.251 | 0.000 | 0.000 | 0.39  | -0.01 | 0.14  | 0.19  | 0.50  | 0.00 | 0.93 | 0.25 | 0.11 | 0.00 | 0.01 | 0.99 | 0.75 | 0.52 | 0.00 | 0  | 0 | 0 | 0 | 0  |
| 5828 | ILMN_220083  | HSPB7             | heat shock 27k       | 1     | -1.313 | 0.000 | 0.000 | -0.19 | -0.21 | 0.12  | 0.26  | -0.15 | 0.28 | 0.23 | 0.49 | 0.14 | 0.37 | 0.39 | 0.70 | 0.89 | 0.54 | 0.47 | 0  | 0 | 0 | 0 | 0  |
| 5881 | ILMN_171363  | ICHTHYIN          | ichthyin protei      | 5     | 1.194  | 0.000 | 0.000 | 0.42  | -0.22 | 0.98  | 0.54  | 0.69  | 0.22 | 0.53 | 0.01 | 0.12 | 0.05 | 0.32 | 0.89 | 0.21 | 0.53 | 0.09 | 0  | 0 | 0 | 0 | 0  |
| 5908 | ILMN_171093  | IFI16             | interferon, qan      | 1     | 1.171  | 0.000 | 0.000 | 0.61  | -0.24 | -0.37 | 0.15  | 0.88  | 0.00 | 0.22 | 0.06 | 0.44 | 0.00 | 0.01 | 0.69 | 0.49 | 0.79 | 0.00 | 0  | 0 | 0 | 0 | 0  |
| 5909 | ILMN_205878  | IFI27             | interferon, alp      | 14    | 1.866  | 0.000 | 0.000 | 6.58  | 0.24  | -0.06 | 3.47  | 7.55  | 0.00 | 0.72 | 0.93 | 0.00 | 0.00 | 0.00 | 0.95 | 0.99 | 0.00 | 0.00 | 1  | 0 | 0 | 1 | 1  |
| 5912 | ILMN_176006  | IFI44L            | interferon-indu      | 1     | 2.002  | 0.000 | 0.000 | 3.14  | -0.21 | -0.23 | 1.83  | 3.66  | 0.00 | 0.48 | 0.44 | 0.00 | 0.00 | 0.00 | 0.87 | 0.87 | 0.00 | 0.00 | 1  | 0 | 0 | 1 | 1  |
| 5913 | ILMN_172391  | IFI44L            | interferon-indu      | 1     | 2.253  | 0.000 | 0.000 | 5.29  | -0.06 | 0.01  | 3.45  | 6.15  | 0.00 | 0.89 | 0.98 | 0.00 | 0.00 | 0.00 | 0.99 | 1.00 | 0.00 | 0.00 | 1  | 0 | 0 | 1 | 1  |
| 5914 | ILMN_234779  | IFI6              | interferon, alp      | 1     | 3.647  | 0.000 | 0.000 | 3.19  | -0.11 | 0.08  | 2.34  | 4.04  | 0.00 | 0.78 | 0.84 | 0.00 | 0.00 | 0.00 | 0.96 | 0.98 | 0.00 | 0.00 | 1  | 0 | 0 | 1 | 1  |
| 5915 | ILMN_168738  | IFI6              | interferon, alp      | 1     | 2.005  | 0.000 | 0.000 | 1.91  | -0.06 | 0.06  | 1.45  | 2.51  | 0.00 | 0.82 | 0.83 | 0.00 | 0.00 | 0.00 | 0.97 | 0.98 | 0.00 | 0.00 | 1  | 0 | 0 | 1 | 1  |
| 5916 | ILMN_178137  | IFIH1             | interferon indu      | 2     | 1.495  | 0.000 | 0.000 | 2.18  | 0.08  | 0.13  | 0.95  | 2.78  | 0.00 | 0.79 | 0.66 | 0.00 | 0.00 | 0.00 | 0.97 | 0.94 | 0.12 | 0.00 | 1  | 0 | 0 | 0 | 1  |
| 5917 | ILMN_170769  | IFIT1             | interferon-indu      | 10    | 2.152  | 0.000 | 0.000 | 4.93  | -0.15 | -0.20 | 2.89  | 6.05  | 0.00 | 0.78 | 0.71 | 0.00 | 0.00 | 0.00 | 0.96 | 0.95 | 0.00 | 0.00 | 1  | 0 | 0 | 1 | 1  |
| 5921 | ILMN_170178  | IFIT3             | interferon-indu      | 10    | 1.676  | 0.000 | 0.000 | 4.64  | -0.14 | 0.06  | 2.65  | 5.45  | 0.00 | 0.77 | 0.90 | 0.00 | 0.00 | 0.00 | 0.96 | 0.99 | 0.00 | 0.00 | 1  | 0 | 0 | 1 | 1  |
| 5950 | ILMN_166936  | IGFBP6            | insulin-like gro     | 12    | -1.811 | 0.000 | 0.000 | 1.07  | -0.17 | 0.00  | 0.21  | 1.44  | 0.03 | 0.73 | 1.00 | 0.68 | 0.01 | 0.07 | 0.96 | 1.00 | 0.90 | 0.01 | 1  | 0 | 0 | 0 | 1  |
| 5995 | ILMN_179957  | IL19              | interleukin 19       | 1     | 2.180  | 0.001 | 0.000 | 1.11  | 0.05  | 0.07  | 0.22  | 0.59  | 0.00 | 0.89 | 0.84 | 0.57 | 0.12 | 0.02 | 0.99 | 0.98 | 0.85 | 0.19 | 1  | 0 | 0 | 0 | 0  |
| 5995 | ILMN_168259  | IL19              | interleukin 19       | 1     | 1.673  | 0.002 | 0.000 | 0.80  | 0.00  | 0.13  | 0.11  | 0.54  | 0.00 | 1.00 | 0.63 | 0.69 | 0.05 | 0.01 | 1.00 | 0.94 | 0.90 | 0.09 | 0  | 0 | 0 | 0 | 0  |
| 5998 | ILMN_177550  | IL1B              | interleukin 1, t     | 2     | 1.886  | 0.010 | 0.000 | 3.27  | -1.38 | 2.06  | 2.10  | 3.91  | 0.00 | 0.03 | 0.00 | 0.00 | 0.00 | 0.00 | 0.28 | 0.13 | 0.11 | 0.00 | 1  | 0 | 0 | 0 | 1  |
| 5999 | ILMN_180490  | IL1F5             | interleukin 1 fe     | 2     | 2.397  | 0.000 | 0.000 | 0.37  | -0.31 | -0.03 | 0.15  | 0.40  | 0.14 | 0.20 | 0.91 | 0.55 | 0.11 | 0.22 | 0.67 | 0.99 | 0.84 | 0.17 | 0  | 0 | 0 | 0 | 0  |
| 6000 | ILMN_169771  | IL1F7             | interleukin 1 fe     | 2     | -2.255 | 0.000 | 0.000 | 2.33  | 0.10  | -0.12 | 0.30  | 2.61  | 0.00 | 0.77 | 0.71 | 0.36 | 0.00 | 0.00 | 0.96 | 0.96 | 0.74 | 0.00 | 1  | 0 | 0 | 0 | 1  |
| 6001 | ILMN_215871  | IL1F9             | interleukin 1 fe     | 2     | 3.203  | 0.000 | 0.000 | 2.69  | -0.08 | 0.28  | 0.54  | 2.52  | 0.00 | 0.85 | 0.52 | 0.22 | 0.00 | 0.00 | 0.98 | 0.90 | 0.63 | 0.00 | 1  | 0 | 0 | 0 | 1  |
| 6007 | ILMN_177487  | IL1RN             | interleukin 1 rr     | 2     | 1.203  | 0.000 | 0.000 | 1.11  | 1.00  | 0.60  | 0.86  | 1.44  | 0.00 | 0.01 | 0.11 | 0.22 | 0.00 | 0.01 | 0.13 | 0.59 | 0.31 | 0.00 | 1  | 0 | 0 | 0 | 1  |
| 6024 | ILMN_165218  | IL4R              | interleukin 4 rr     | 16    | 1.513  | 0.000 | 0.000 | 0.31  | 0.09  | 0.29  | 0.22  | 0.48  | 0.04 | 0.53 | 0.06 | 0.14 | 0.00 | 0.09 | 0.89 | 0.50 | 0.55 | 0.01 | 0  | 0 | 0 | 0 | 0  |
| 6029 | ILMN_234257  | IL7R              | interleukin 7 rr     | 5     | 1.174  | 0.000 | 0.000 | 1.94  | 0.02  | 1.08  | 1.60  | 2.68  | 0.00 | 0.98 | 0.05 | 0.00 | 0.00 | 0.00 | 1.00 | 0.47 | 0.19 | 0.00 | 1  | 0 | 0 | 0 | 1  |
| 6030 | ILMN_169134  | IL7R              | PREDICTED: interleuk | 4     | 1.405  | 0.001 | 0.000 | 2.15  | 0.18  | 1.36  | 1.89  | 3.26  | 0.00 | 0.75 | 0.02 | 0.00 | 0.00 | 0.00 | 0.96 | 0.37 | 0.14 | 0.00 | 1  | 0 | 0 | 0 | 1  |
| 6031 | ILMN_218437  | IL8               | interleukin 8 (I     | 4     | 4.261  | 0.001 | 0.000 | 0.97  | -0.14 | 0.97  | 0.98  | 1.12  | 0.01 | 0.69 | 0.01 | 0.01 | 0.02 | 0.94 | 0.22 | 0.19 | 0.01 | 0    | 0  | 0 | 0 | 1 |    |
| 6032 | ILMN_166673  | IL8               | interleukin 8 (I     | 4     | 3.416  | 0.003 | 0.000 | 1.48  | -0.09 | 1.24  | 1.15  | 1.69  | 0.00 | 0.81 | 0.00 | 0.00 | 0.00 | 0.00 | 0.97 | 0.13 | 0.17 | 0.00 | 1  | 0 | 0 | 0 | 1  |
| 6072 | ILMN_179347  | INSIG1            | insulin induced      | 7     | -1.331 | 0.000 | 0.000 | -0.37 | -0.16 | 0.36  | 0.17  | -0.27 | 0.11 | 0.48 | 0.12 | 0.46 | 0.25 | 0.19 | 0.87 | 0.63 | 0.79 | 0.34 | 0  | 0 | 0 | 0 | 0  |
| 6110 | ILMN_174596  | IRAK2             | interleukin-1 rr     | 3     | 1.762  | 0.000 | 0.000 | 0.54  | -0.64 | 0.80  | 0.38  | 0.70  | 0.02 | 0.01 | 0.00 | 0.11 | 0.00 | 0.05 | 0.12 | 0.10 | 0.51 | 0.01 | 0  | 0 | 0 | 0 | 0  |
| 6111 | ILMN_166169  | IRAK3             | interleukin-1 rr     | 12    | 1.053  | 0.000 | 0.000 | 0.85  | -0.40 | 0.37  | 0.24  | 0.85  | 0.00 | 0.07 | 0.09 | 0.27 | 0.00 | 0.00 | 0.42 | 0.57 | 0.67 | 0.00 | 0  | 0 | 0 | 0 | 0  |
| 6122 | ILMN_234906  | IRF7              | interferon reagu     | 11    | 1.814  | 0.000 | 0.000 | 3.06  | -0.02 | -0.02 | 1.70  | 3.72  | 0.00 | 0.94 | 0.95 | 0.00 | 0.00 | 0.00 | 0.99 | 1.00 | 0.00 | 0.00 | 1  | 0 | 0 | 1 | 1  |
| 6123 | ILMN_179818  | IRF7              | interferon reagu     | 11    | 2.224  | 0.000 | 0.000 | 3.36  | 0.01  | 0.00  | 1.87  | 3.93  | 0.00 | 0.99 | 0.99 | 0.00 | 0.00 | 0.00 | 1.00 | 1.00 | 0.00 | 0.00 | 1  | 0 | 0 | 1 | 1  |
| 6124 | ILMN_166659  | IRF8              | interferon reagu     | 16    | 1.082  | 0.000 | 0.000 | -0.24 | 0.10  | 0.15  | -0.23 | -0.42 | 0.11 | 0.50 | 0.31 | 0.13 | 0.01 | 0.19 | 0.88 | 0.80 | 0.53 | 0.02 | 0  | 0 | 0 | 0 | 0  |
| 6134 | ILMN_205401  | ISG15             | ISG15 ubiquititi     | 1     | 2.733  | 0.000 | 0.000 | 4.65  | 0.02  | -0.04 | 2.70  | 5.56  | 0.00 | 0.98 | 0.94 | 0.00 | 0.00 | 0.00 | 1.00 | 0.99 | 0.00 | 0.00 | 1  | 0 | 0 | 1 | 1  |
| 6135 | ILMN_165991  | ISG20             | interferon stim      | 15    | 1.524  | 0.000 | 0.000 | 5.87  | 0.01  | 0.20  | 2.16  | 6.99  | 0.00 | 0.99 | 0.76 | 0.00 | 0.00 | 0.00 | 1.00 | 0.96 | 0.14 | 0.00 | 1  | 0 | 0 | 0 | 1  |
| 6189 | ILMN_173610  | ITPR2             | inositol 1,4,5-t     | 12    | -1.089 | 0.000 | 0.000 | 0.00  | 0.00  | 0.35  | 0.02  | -0.06 | 0.99 | 0.98 | 0.04 | 0.93 | 0.71 | 0.99 | 1.00 | 0.45 | 0.98 | 0.78 | 0  | 0 | 0 | 0 | 0  |
| 6238 | ILMN_174496  | KCNAB1            | potassium volt       | 3     | -1.081 | 0.000 | 0.000 | -0.67 | -0.06 | 0.21  | -0.65 | -1.10 | 0.07 | 0.86 | 0.57 | 0.08 | 0.00 | 0.13 | 0.98 | 0.92 | 0.46 | 0.01 | 0  | 0 | 0 | 0 | -1 |
| 6292 | ILMN_228599  | KIAA0101          | KIAA0101 (KIA        | 15    | 1.579  | 0.000 | 0.000 | -0.75 | -0.97 | -0.02 | -0.59 | -0.97 | 0.02 | 0.00 | 0.95 | 0.06 | 0.00 | 0.04 | 0.06 | 0.99 | 0.41 | 0.01 | 0  | 0 | 0 | 0 | 0  |
| 6318 | ILMN_181062  | KIAA0367          | KIAA0367 (KIA        | 9     | -1.064 | 0.000 | 0.000 | 0.00  | -0.17 | -0.32 | -0.15 | -0.12 | 0.98 | 0.36 | 0.08 | 0.42 | 0.49 | 0.99 | 0.81 | 0.55 | 0.77 | 0.59 | 0  | 0 | 0 | 0 | 0  |
| 6434 | ILMN_169556  | KIF20A            | kinesin family       | 5     | 1.236  | 0.000 | 0.000 | -0.23 | -0.28 | 0.17  | -0.17 | -0.30 | 0.15 | 0.07 | 0.28 | 0.27 | 0.06 | 0.24 | 0.43 | 0.78 | 0.67 | 0.10 | 0  | 0 | 0 | 0 | 0  |
| 6455 | ILMN_173593  | KLF2              | Kruppel-like fa      | 19    | -1.017 | 0.000 | 0.000 | -0.50 | 0.84  | -0.30 | -0.36 | -0.86 | 0.07 | 0.00 | 0.26 | 0.18 | 0.00 | 0.13 | 0.06 | 0.76 | 0.59 | 0.01 | 0  | 0 | 0 | 0 | 0  |
| 6461 | ILMN_177852  | KLF9              | Kruppel-like fa      | 9     | -1.247 | 0.000 | 0.000 | 0.83  | 0.42  | 0.89  | 0.69  | 1.01  | 0.00 | 0.10 | 0.00 | 0.01 | 0.00 | 0.01 | 0.51 | 0.10 | 0.23 | 0.00 | 0  | 0 | 0 | 0 | 1  |
| 6489 | ILMN_207965  | KLRB1             | killer cell lectin   | 12    | 1.244  | 0.012 | 0.000 | -0.12 | 0.11  | 0.02  | 0.18  | 0.07  | 0.57 | 0.59 | 0.91 | 0.40 | 0.74 | 0.68 | 0.91 | 0.99 | 0.76 | 0.80 | 0  | 0 | 0 | 0 | 0  |
| 6522 | ILMN_174651  | KYNU              | kynureninase (       | 2     | 3.626  | 0.000 | 0.000 | 0.80  | -0.56 | 0.69  | 0.60  | 1.09  | 0.00 | 0.00 | 0.00 | 0.00 | 0.00 | 0.05 | 0.05 | 0.09 | 0.00 | 0    | 0  | 0 | 0 | 1 |    |
| 6523 | ILMN_173751  | KYNU              | kynureninase (       | 2     | 2.175  | 0.000 | 0.000 | 1.12  | -0.54 | 0.79  | 0.73  | 1.49  | 0.00 | 0.01 | 0.00 | 0.00 | 0.00 | 0.00 | 0.13 | 0.05 | 0.07 | 0.00 | 1  | 0 | 0 | 0 | 1  |
| 6551 | ILMN_217081  | LAMP3             | lysosomal-assc       | 3     | 1.356  | 0.000 | 0.000 | 3.44  | 1.28  | 0.89  | 1.83  | 4.71  | 0.00 | 0.06 | 0.19 | 0.01 | 0.00 | 0.00 | 0.39 | 0.71 | 0.22 | 0.00 | 1  | 0 | 0 | 0 | 1  |
| 6577 | ILMN_176766  | LASS6             | LAG1 homolog         | 2     | -1.117 | 0.000 | 0.000 | -0.16 | 0.17  | -0.25 | -0.11 | -0.27 | 0.30 | 0.28 | 0.11 | 0.48 | 0.09 | 0.42 | 0.74 | 0.59 | 0.80 | 0.14 | 0  | 0 | 0 | 0 | 0  |
| 6610 | ILMN_223495  | LEPR              | leptin receptor      | 1     | -2.078 | 0.000 | 0.000 | -0.19 | -0.16 | -0.07 | 0.06  | -0.18 | 0.09 | 0.15 | 0.54 | 0.57 | 0.12 | 0.16 | 0.59 | 0.91 | 0.86 | 0.18 | 0  | 0 | 0 | 0 | 0  |
| 6621 | ILMN_180378  | LGALS3            | lectin, galactos     | 14    | -1.165 | 0.000 | 0.000 | -1.31 | 0.20  | -0.47 | -0.48 | -1.69 | 0.00 | 0.50 | 0.12 | 0.11 | 0.00 | 0.00 | 0.88 | 0.63 | 0.52 | 0.00 | -1 | 0 | 0 | 0 | -1 |
| 6622 | ILMN_165968  | LGALS3BP          | lectin, galactos     | 17    | 1.174  | 0.000 | 0.000 | 2.19  | 0.30  | 0.28  | 1.16  | 2.77  | 0.00 | 0.26 | 0.29 | 0.00 | 0.00 | 0.00 |      |      |      |      |    |   |   |   |    |



Table S2.xls

|      |             |           |                  |    |        |       |       |       |       |       |       |       |      |      |      |      |      |      |      |      |      |      |    |   |   |   |    |
|------|-------------|-----------|------------------|----|--------|-------|-------|-------|-------|-------|-------|-------|------|------|------|------|------|------|------|------|------|------|----|---|---|---|----|
| 7572 | ILMN_166521 | LTBP4     | latent transfor  | 19 | -1.006 | 0.000 | 0.000 | 0.16  | -0.13 | -0.04 | 0.05  | 0.16  | 0.13 | 0.19 | 0.70 | 0.64 | 0.12 | 0.21 | 0.66 | 0.95 | 0.89 | 0.19 | 0  | 0 | 0 | 0 | 0  |
| 7593 | ILMN_178115 | LYN       | v-yes-1 Yamac    | 8  | 1.277  | 0.000 | 0.000 | 0.82  | -0.52 | 0.07  | 0.29  | 0.91  | 0.00 | 0.02 | 0.77 | 0.21 | 0.00 | 0.00 | 0.24 | 0.96 | 0.62 | 0.00 | 0  | 0 | 0 | 0 | 0  |
| 7607 | ILMN_181520 | LYZ       | lysozyme (ren    | 12 | 1.575  | 0.001 | 0.000 | -0.11 | -0.33 | -0.03 | -0.16 | -0.13 | 0.56 | 0.08 | 0.89 | 0.38 | 0.49 | 0.66 | 0.44 | 0.98 | 0.75 | 0.58 | 0  | 0 | 0 | 0 | 0  |
| 7619 | ILMN_177756 | MAD2L1    | MAD2 mitotic     | 4  | 1.193  | 0.000 | 0.000 | -0.41 | -0.37 | 0.11  | -0.32 | -0.53 | 0.06 | 0.08 | 0.60 | 0.13 | 0.02 | 0.12 | 0.46 | 0.93 | 0.54 | 0.03 | 0  | 0 | 0 | 0 | 0  |
| 7630 | ILMN_166157 | MAFA      | v-maf musculo    | 8  | 1.505  | 0.000 | 0.000 | 1.76  | 0.05  | 0.18  | 1.34  | 2.27  | 0.00 | 0.83 | 0.40 | 0.00 | 0.00 | 0.00 | 0.98 | 0.85 | 0.00 | 0.00 | 1  | 0 | 0 | 1 | 1  |
| 7886 | ILMN_212290 | MELK      | maternal embr    | 9  | 1.553  | 0.000 | 0.000 | 0.33  | -0.57 | 0.06  | -0.27 | 0.47  | 0.09 | 0.01 | 0.77 | 0.18 | 0.02 | 0.17 | 0.10 | 0.96 | 0.58 | 0.04 | 0  | 0 | 0 | 0 | 0  |
| 7923 | ILMN_173341 | MFPAP5    | microfibrillar a | 12 | -1.506 | 0.000 | 0.000 | -0.57 | -0.27 | -0.12 | -0.24 | -0.50 | 0.00 | 0.05 | 0.37 | 0.08 | 0.00 | 0.00 | 0.36 | 0.83 | 0.45 | 0.00 | 0  | 0 | 0 | 0 | 0  |
| 7947 | ILMN_175074 | MGC102966 | PREDICTED: si    | 17 | 3.315  | 0.000 | 0.000 | -0.01 | 0.01  | 0.09  | -0.02 | 0.00  | 0.90 | 0.91 | 0.32 | 0.84 | 0.96 | 0.93 | 0.99 | 0.80 | 0.96 | 0.97 | 0  | 0 | 0 | 0 | 0  |
| 7974 | ILMN_177612 | MGC42367  | similar to 201C  | 2  | -1.246 | 0.000 | 0.000 | -0.52 | -0.32 | -0.46 | -0.32 | -0.42 | 0.03 | 0.18 | 0.05 | 0.18 | 0.08 | 0.07 | 0.63 | 0.47 | 0.58 | 0.12 | 0  | 0 | 0 | 0 | 0  |
| 7990 | ILMN_178195 | MGST1     | microsomal gl    | 12 | -1.403 | 0.001 | 0.000 | 0.62  | -0.28 | 0.21  | 0.44  | 0.96  | 0.03 | 0.30 | 0.43 | 0.11 | 0.00 | 0.06 | 0.76 | 0.86 | 0.51 | 0.00 | 0  | 0 | 0 | 0 | 0  |
| 7992 | ILMN_235516 | MGST1     | microsomal gl    | 12 | -2.061 | 0.000 | 0.000 | 0.45  | -0.36 | 0.29  | 0.38  | 0.65  | 0.07 | 0.14 | 0.23 | 0.12 | 0.01 | 0.13 | 0.58 | 0.74 | 0.53 | 0.02 | 0  | 0 | 0 | 0 | 0  |
| 8002 | ILMN_181513 | MICALL1   | MICAL-like 1 (I  | 22 | 1.272  | 0.000 | 0.000 | 0.50  | 0.32  | 0.35  | 0.42  | 0.71  | 0.00 | 0.04 | 0.03 | 0.01 | 0.00 | 0.01 | 0.32 | 0.37 | 0.22 | 0.00 | 0  | 0 | 0 | 0 | 0  |
| 8052 | ILMN_220291 | MLSTD1    | male sterility d | 12 | -2.102 | 0.000 | 0.000 | 0.45  | 1.48  | 0.16  | -0.09 | 0.48  | 0.00 | 0.00 | 0.28 | 0.55 | 0.00 | 0.01 | 0.00 | 0.78 | 0.84 | 0.01 | 0  | 1 | 0 | 0 | 0  |
| 8064 | ILMN_207375 | MMP12     | matrix metallo   | 11 | 1.249  | 0.006 | 0.000 | -0.43 | 1.59  | 0.05  | 0.53  | 0.23  | 0.53 | 0.02 | 0.94 | 0.44 | 0.74 | 0.64 | 0.24 | 0.99 | 0.78 | 0.80 | 0  | 0 | 0 | 0 | 0  |
| 8071 | ILMN_168540 | MMP7      | matrix metallo   | 11 | -1.352 | 0.005 | 0.000 | 0.70  | -0.20 | 0.50  | 0.98  | 1.32  | 0.13 | 0.66 | 0.28 | 0.04 | 0.01 | 0.22 | 0.94 | 0.77 | 0.36 | 0.01 | 0  | 0 | 0 | 0 | 1  |
| 8072 | ILMN_219207 | MMP7      | matrix metallo   | 11 | -1.444 | 0.002 | 0.000 | 0.71  | -0.13 | 0.66  | 1.02  | 1.44  | 0.12 | 0.77 | 0.14 | 0.03 | 0.00 | 0.20 | 0.96 | 0.66 | 0.33 | 0.01 | 0  | 0 | 0 | 0 | 1  |
| 8073 | ILMN_179631 | MMP9      | matrix metallo   | 20 | 1.179  | 0.000 | 0.000 | -0.15 | -0.12 | 0.15  | 0.00  | -0.20 | 0.21 | 0.32 | 0.21 | 1.00 | 0.10 | 0.32 | 0.78 | 0.72 | 1.00 | 0.15 | 0  | 0 | 0 | 0 | 0  |
| 8087 | ILMN_224798 | MOCS1     | molybdenum c     | 6  | 1.465  | 0.000 | 0.000 | -0.01 | 0.07  | 0.23  | 0.10  | -0.11 | 0.94 | 0.49 | 0.02 | 0.30 | 0.24 | 0.96 | 0.88 | 0.33 | 0.70 | 0.33 | 0  | 0 | 0 | 0 | 0  |
| 8110 | ILMN_178136 | MPHOSPH6  | M-phase phosf    | 16 | 1.496  | 0.000 | 0.000 | -0.32 | 0.07  | -0.04 | -0.08 | -0.26 | 0.02 | 0.60 | 0.78 | 0.58 | 0.07 | 0.06 | 0.92 | 0.97 | 0.86 | 0.11 | 0  | 0 | 0 | 0 | 0  |
| 8118 | ILMN_177651 | MPPE1     | metallophosph    | 18 | -1.257 | 0.000 | 0.000 | -0.30 | -0.15 | -0.15 | -0.12 | -0.42 | 0.01 | 0.16 | 0.16 | 0.26 | 0.00 | 0.02 | 0.60 | 0.68 | 0.67 | 0.00 | 0  | 0 | 0 | 0 | 0  |
| 8123 | ILMN_175293 | MPZL2     | myelin protein   | 11 | 1.158  | 0.000 | 0.000 | -0.35 | -0.23 | -0.23 | -0.44 | -0.41 | 0.04 | 0.17 | 0.17 | 0.01 | 0.01 | 0.08 | 0.62 | 0.70 | 0.23 | 0.03 | 0  | 0 | 0 | 0 | 0  |
| 8284 | ILMN_168666 | MT2A      | metallothioneir  | 16 | 1.267  | 0.000 | 0.000 | 3.24  | -0.97 | 1.35  | 2.20  | 3.56  | 0.00 | 0.02 | 0.00 | 0.00 | 0.00 | 0.00 | 0.23 | 0.13 | 0.00 | 0.00 | 1  | 0 | 0 | 1 | 1  |
| 8315 | ILMN_176929 | MTRR11    | myotubularin r   | 1  | -1.085 | 0.000 | 0.000 | 0.67  | -0.22 | 0.01  | 0.07  | 0.70  | 0.00 | 0.11 | 0.96 | 0.63 | 0.00 | 0.00 | 0.52 | 1.00 | 0.88 | 0.00 | 0  | 0 | 0 | 0 | 0  |
| 8349 | ILMN_237191 | MUC1      | mucin 1, cell si | 1  | -1.665 | 0.000 | 0.000 | 1.33  | 0.13  | 0.08  | 0.40  | 1.54  | 0.00 | 0.65 | 0.79 | 0.15 | 0.00 | 0.00 | 0.93 | 0.97 | 0.56 | 0.00 | 1  | 0 | 0 | 0 | 1  |
| 8350 | ILMN_175699 | MUC1      | mucin 1, cell si | 1  | -2.241 | 0.000 | 0.000 | 1.69  | 0.07  | 0.00  | 0.47  | 1.91  | 0.00 | 0.84 | 1.00 | 0.17 | 0.00 | 0.00 | 0.98 | 1.00 | 0.58 | 0.00 | 1  | 0 | 0 | 0 | 1  |
| 8352 | ILMN_181097 | MUC1L     | mucin-like 1 (I  | 12 | -1.304 | 0.000 | 0.000 | 2.31  | 0.17  | 0.11  | 0.21  | 2.48  | 0.00 | 0.61 | 0.74 | 0.53 | 0.00 | 0.00 | 0.92 | 0.96 | 0.83 | 0.00 | 1  | 0 | 0 | 0 | 1  |
| 8365 | ILMN_166235 | MX1       | mxvovirus (infl  | 21 | 2.417  | 0.000 | 0.000 | 4.25  | -0.24 | -0.19 | 2.84  | 4.80  | 0.00 | 0.57 | 0.65 | 0.00 | 0.00 | 0.00 | 0.90 | 0.94 | 0.00 | 0.00 | 1  | 0 | 0 | 1 | 1  |
| 8366 | ILMN_223192 | MX2       | mxvovirus (infl  | 21 | 1.728  | 0.000 | 0.000 | 3.85  | -0.01 | -0.34 | 2.15  | 4.68  | 0.00 | 0.98 | 0.44 | 0.00 | 0.00 | 0.00 | 1.00 | 0.87 | 0.00 | 0.00 | 1  | 0 | 0 | 1 | 1  |
| 8367 | ILMN_221467 | MXD1      | MAX dimerizati   | 2  | 1.101  | 0.000 | 0.000 | 0.37  | 0.07  | -0.01 | -0.03 | 0.44  | 0.08 | 0.75 | 0.98 | 0.87 | 0.04 | 0.14 | 0.96 | 1.00 | 0.97 | 0.07 | 0  | 0 | 0 | 0 | 0  |
| 8370 | ILMN_235057 | MYADM     | myeloid-associ   | 19 | -1.067 | 0.000 | 0.000 | -1.17 | -0.44 | -0.04 | -0.25 | -1.23 | 0.00 | 0.13 | 0.88 | 0.39 | 0.00 | 0.00 | 0.56 | 0.98 | 0.75 | 0.00 | -1 | 0 | 0 | 0 | -1 |
| 8371 | ILMN_230884 | MYADM     | myeloid-associ   | 19 | -1.497 | 0.000 | 0.000 | -1.52 | -0.50 | -0.04 | -0.59 | -1.79 | 0.00 | 0.16 | 0.91 | 0.10 | 0.00 | 0.00 | 0.61 | 0.99 | 0.49 | 0.00 | -1 | 0 | 0 | 0 | -1 |
| 8379 | ILMN_173852 | MYD88     | myeloid differe  | 3  | 1.011  | 0.000 | 0.000 | 0.67  | -0.56 | -0.07 | 0.25  | 0.92  | 0.00 | 0.00 | 0.65 | 0.11 | 0.00 | 0.00 | 0.03 | 0.94 | 0.52 | 0.00 | 0  | 0 | 0 | 0 | 0  |
| 8382 | ILMN_166008 | MYH11     | myosin, heavy    | 16 | -1.478 | 0.000 | 0.000 | 3.41  | -0.06 | 0.92  | 1.40  | 3.99  | 0.00 | 0.92 | 0.12 | 0.02 | 0.00 | 0.00 | 0.99 | 0.61 | 0.30 | 0.00 | 1  | 0 | 0 | 0 | 1  |
| 8392 | ILMN_167506 | MYL9      | myosin, light c  | 20 | -1.818 | 0.000 | 0.000 | -0.11 | 0.36  | 0.10  | 0.18  | -0.16 | 0.65 | 0.14 | 0.68 | 0.46 | 0.52 | 0.74 | 0.57 | 0.95 | 0.79 | 0.61 | 0  | 0 | 0 | 0 | 0  |
| 8407 | ILMN_169822 | MYOSA     | myosin VA (he    | 15 | 1.135  | 0.000 | 0.000 | -0.03 | -0.01 | -0.02 | -0.06 | -0.05 | 0.79 | 0.92 | 0.88 | 0.60 | 0.70 | 0.85 | 0.99 | 0.98 | 0.87 | 0.77 | 0  | 0 | 0 | 0 | 0  |
| 8411 | ILMN_168034 | MYOM1     | myomesin 1, I    | 18 | -1.356 | 0.000 | 0.000 | -0.13 | 0.24  | -0.07 | -0.11 | -0.16 | 0.35 | 0.09 | 0.62 | 0.41 | 0.24 | 0.46 | 0.47 | 0.94 | 0.77 | 0.33 | 0  | 0 | 0 | 0 | 0  |
| 8444 | ILMN_165387 | NAMPT     | nicotinamide p   | 7  | 1.783  | 0.000 | 0.000 | 1.50  | -0.54 | 0.23  | 0.61  | 1.71  | 0.00 | 0.14 | 0.52 | 0.09 | 0.00 | 0.50 | 0.57 | 0.90 | 0.48 | 0.00 | 1  | 0 | 0 | 0 | 1  |
| 8459 | ILMN_210941 | NAPSB     | napsin B aspar   | 19 | 1.103  | 0.000 | 0.000 | 0.86  | 0.14  | -0.05 | 0.18  | 1.05  | 0.00 | 0.60 | 0.85 | 0.50 | 0.00 | 0.01 | 0.92 | 0.98 | 0.81 | 0.00 | 0  | 0 | 0 | 0 | 1  |
| 8484 | ILMN_178959 | NBL1      | neuroblastoma    | 1  | -1.178 | 0.000 | 0.000 | -0.35 | 0.06  | 0.26  | -0.04 | -0.29 | 0.06 | 0.74 | 0.17 | 0.84 | 0.13 | 0.12 | 0.96 | 0.69 | 0.96 | 0.19 | 0  | 0 | 0 | 0 | 0  |
| 8502 | ILMN_175144 | NCAPG     | non-SMC cond     | 4  | 1.217  | 0.000 | 0.000 | -0.29 | -0.44 | 0.11  | -0.36 | -0.43 | 0.18 | 0.05 | 0.59 | 0.09 | 0.05 | 0.28 | 0.34 | 0.93 | 0.49 | 0.08 | 0  | 0 | 0 | 0 | 0  |
| 8609 | ILMN_173814 | NES       | nestin (NES), r  | 1  | 1.029  | 0.002 | 0.000 | -0.43 | -0.29 | 0.23  | 0.19  | -0.69 | 0.12 | 0.30 | 0.40 | 0.50 | 0.01 | 0.20 | 0.76 | 0.85 | 0.81 | 0.03 | 0  | 0 | 0 | 0 | 0  |
| 8611 | ILMN_176084 | NETO2     | neuropilin (NRI  | 16 | 1.103  | 0.000 | 0.000 | -0.19 | 0.34  | 0.21  | 0.17  | -0.12 | 0.23 | 0.03 | 0.17 | 0.28 | 0.46 | 0.34 | 0.28 | 0.70 | 0.68 | 0.56 | 0  | 0 | 0 | 0 | 0  |
| 8630 | ILMN_204976 | NFE2L3    | nuclear factor   | 7  | 1.043  | 0.000 | 0.000 | 1.84  | 0.40  | 0.85  | 0.85  | 2.23  | 0.00 | 0.16 | 0.00 | 0.00 | 0.00 | 0.00 | 0.60 | 0.17 | 0.16 | 0.00 | 1  | 0 | 0 | 0 | 1  |
| 8711 | ILMN_172376 | NLRX1     | NLR family me    | 11 | 1.339  | 0.000 | 0.000 | -0.31 | -0.08 | -0.17 | -0.33 | -0.45 | 0.01 | 0.49 | 0.13 | 0.00 | 0.00 | 0.02 | 0.88 | 0.64 | 0.16 | 0.00 | 0  | 0 | 0 | 0 | 0  |
| 8712 | ILMN_169875 | NLRX1     | NLR family me    | 11 | 1.203  | 0.000 | 0.000 | -0.15 | 0.06  | -0.05 | -0.11 | -0.19 | 0.04 | 0.44 | 0.52 | 0.12 | 0.01 | 0.08 | 0.85 | 0.90 | 0.53 | 0.02 | 0  | 0 | 0 | 0 | 0  |
| 8745 | ILMN_176259 | NOD2      | nucleotide-binc  | 16 | 1.441  | 0.000 | 0.000 | 1.29  | -0.40 | -0.19 | -0.23 | 1.45  | 0.00 | 0.30 | 0.62 | 0.55 | 0.00 | 0.01 | 0.77 | 0.94 | 0.84 | 0.00 | 1  | 0 | 0 | 0 | 1  |
| 8780 | ILMN_178718 | NOV       | nephroblastom    | 8  | -1.328 | 0.000 | 0.000 | -0.65 | -0.27 | -0.42 | -0.49 | -0.81 | 0.00 | 0.08 | 0.01 | 0.00 | 0.00 | 0.45 | 0.25 | 0.13 | 0.00 | 0    | 0  | 0 | 0 | 0 |    |
| 8782 | ILMN_217217 | NP        | nucleoside pho   | 14 | 1.841  | 0.000 | 0.000 | 0.09  | 0.12  | 0.07  | 0.18  | 0.11  | 0.67 | 0.59 | 0.75 | 0.41 | 0.62 | 0.76 | 0.91 | 0.96 | 0.77 | 0.70 | 0  | 0 | 0 | 0 | 0  |
| 8798 | ILMN_211025 | NPM3      | nucleophosmin    | 10 | 1.047  | 0.000 | 0.000 | -1.08 | 0.09  | -0.08 | -0.40 | -1.40 | 0.00 | 0.53 | 0.59 | 0.01 | 0.00 | 0.00 | 0.89 | 0.92 | 0.21 | 0.00 | -1 | 0 | 0 | 0 | -1 |
| 8864 | ILMN_176973 | NT5C3     | 5'-nucleotidase  | 7  | 1.078  | 0.000 | 0.000 | 2.54  | 0.10  | -0.03 | 0.76  | 3.58  | 0.00 | 0.82 | 0.95 | 0.09 | 0.00 | 0.00 | 0.97 | 0.99 | 0.48 | 0.00 |    |   |   |   |    |

Table S2.xls

|       |             |          |                  |    |        |       |       |       |       |       |       |       |      |      |      |      |      |      |      |      |      |      |    |   |   |   |    |
|-------|-------------|----------|------------------|----|--------|-------|-------|-------|-------|-------|-------|-------|------|------|------|------|------|------|------|------|------|------|----|---|---|---|----|
| 9389  | ILMN_167354 | PGM2     | phosphoglucon    | 4  | 1.171  | 0.000 | 0.000 | -0.45 | 0.10  | 0.14  | -0.06 | -0.30 | 0.00 | 0.51 | 0.34 | 0.70 | 0.04 | 0.01 | 0.88 | 0.82 | 0.91 | 0.08 | 0  | 0 | 0 | 0 | 0  |
| 9393  | ILMN_178138 | PGM5     | phosphoglucon    | 9  | -1.585 | 0.000 | 0.000 | -0.53 | -0.26 | -0.40 | -0.37 | -0.55 | 0.00 | 0.09 | 0.01 | 0.02 | 0.00 | 0.00 | 0.48 | 0.27 | 0.28 | 0.00 | 0  | 0 | 0 | 0 | 0  |
| 9394  | ILMN_170959 | PGM5     | phosphoglucon    | 9  | -1.638 | 0.000 | 0.000 | -0.52 | -0.25 | -0.34 | -0.46 | -0.61 | 0.00 | 0.14 | 0.05 | 0.01 | 0.00 | 0.01 | 0.58 | 0.46 | 0.22 | 0.00 | 0  | 0 | 0 | 0 | 0  |
| 9461  | ILMN_177307 | PHYH     | phytanoyl-CoA    | 10 | -1.210 | 0.000 | 0.000 | -1.01 | 0.10  | 0.37  | -0.52 | -1.23 | 0.00 | 0.48 | 0.02 | 0.00 | 0.00 | 0.00 | 0.87 | 0.31 | 0.08 | 0.00 | -1 | 0 | 0 | 0 | -1 |
| 9557  | ILMN_233902 | PKD1     | polycystic kidn  | 16 | -1.093 | 0.000 | 0.000 | -0.03 | -0.01 | 0.09  | 0.04  | -0.06 | 0.80 | 0.91 | 0.47 | 0.76 | 0.63 | 0.85 | 0.99 | 0.88 | 0.93 | 0.72 | 0  | 0 | 0 | 0 | 0  |
| 9578  | ILMN_169762 | PLA2G4B  | phospholipase    | 15 | 1.361  | 0.000 | 0.000 | 1.37  | -0.11 | 0.20  | 0.22  | 1.50  | 0.00 | 0.67 | 0.46 | 0.41 | 0.00 | 0.00 | 0.94 | 0.88 | 0.77 | 0.00 | 1  | 0 | 0 | 0 | 1  |
| 9588  | ILMN_165605 | PLAU     | plasminogen a    | 10 | 1.020  | 0.000 | 0.000 | -1.33 | -0.34 | -0.20 | -0.80 | -1.75 | 0.00 | 0.26 | 0.52 | 0.01 | 0.00 | 0.00 | 0.73 | 0.90 | 0.25 | 0.00 | -1 | 0 | 0 | 0 | -1 |
| 9594  | ILMN_176939 | PLCD1    | phospholipase    | 3  | 1.063  | 0.000 | 0.000 | -0.08 | -0.13 | 0.51  | 0.24  | 0.01  | 0.51 | 0.31 | 0.00 | 0.06 | 0.96 | 0.62 | 0.77 | 0.04 | 0.41 | 0.97 | 0  | 0 | 0 | 0 | 0  |
| 9597  | ILMN_206156 | PLCH2    | phospholipase    | 1  | -1.372 | 0.000 | 0.000 | -0.06 | 0.09  | -0.10 | -0.10 | -0.07 | 0.52 | 0.31 | 0.26 | 0.28 | 0.42 | 0.63 | 0.78 | 0.76 | 0.68 | 0.52 | 0  | 0 | 0 | 0 | 0  |
| 9600  | ILMN_174745 | PLCXD1   | phosphatidylin X | 1  | 1.208  | 0.000 | 0.000 | -1.21 | 0.01  | -0.41 | -0.61 | -1.58 | 0.00 | 0.97 | 0.13 | 0.02 | 0.00 | 0.00 | 1.00 | 0.63 | 0.31 | 0.00 | -1 | 0 | 0 | 0 | -1 |
| 9607  | ILMN_179576 | PLEK     | pleckstrin (PLE  | 2  | 1.249  | 0.011 | 0.000 | 0.38  | 0.19  | 0.41  | 0.11  | 0.27  | 0.04 | 0.29 | 0.02 | 0.53 | 0.13 | 0.08 | 0.75 | 0.36 | 0.83 | 0.20 | 0  | 0 | 0 | 0 | 0  |
| 9685  | ILMN_166258 | PNPLA7   | patatin-like ph  | 9  | -1.549 | 0.000 | 0.000 | -0.88 | 0.01  | -0.29 | -0.57 | -1.34 | 0.00 | 0.98 | 0.27 | 0.03 | 0.00 | 0.01 | 1.00 | 0.77 | 0.34 | 0.00 | 0  | 0 | 0 | 0 | -1 |
| 9779  | ILMN_167428 | PPAD     | peroxisome pri   | 6  | 1.279  | 0.000 | 0.000 | -0.46 | -0.41 | 0.06  | 0.05  | -0.34 | 0.00 | 0.01 | 0.67 | 0.72 | 0.02 | 0.01 | 0.11 | 0.95 | 0.91 | 0.04 | 0  | 0 | 0 | 0 | 0  |
| 9781  | ILMN_180022 | PPARG    | peroxisome pri   | 3  | -1.423 | 0.000 | 0.000 | -2.35 | 1.46  | -0.51 | -0.84 | -3.01 | 0.00 | 0.00 | 0.18 | 0.03 | 0.00 | 0.00 | 0.01 | 0.70 | 0.33 | 0.00 | -1 | 1 | 0 | 0 | -1 |
| 9836  | ILMN_176196 | PPP1R14A | protein phosph   | 19 | -1.390 | 0.000 | 0.000 | -0.43 | 0.74  | -0.01 | -0.16 | -0.37 | 0.00 | 0.00 | 0.96 | 0.17 | 0.00 | 0.00 | 1.00 | 0.58 | 0.01 | 0.00 | 0  | 0 | 0 | 0 | 0  |
| 9859  | ILMN_166073 | PPP2R2B  | protein phosph   | 5  | -1.015 | 0.000 | 0.000 | -0.13 | -0.10 | 0.00  | -0.11 | -0.15 | 0.11 | 0.26 | 0.97 | 0.19 | 0.09 | 0.20 | 0.73 | 1.00 | 0.59 | 0.14 | 0  | 0 | 0 | 0 | 0  |
| 9902  | ILMN_165507 | PRDM1    | PR domain con    | 6  | 1.481  | 0.000 | 0.000 | 0.99  | -0.13 | 0.60  | 0.69  | 1.24  | 0.00 | 0.66 | 0.04 | 0.02 | 0.00 | 0.00 | 0.94 | 0.44 | 0.30 | 0.00 | 0  | 0 | 0 | 0 | 1  |
| 9928  | ILMN_178750 | PRIC285  | peroxisomal pr   | 20 | 1.884  | 0.000 | 0.000 | 4.49  | 0.07  | 0.10  | 2.14  | 5.15  | 0.00 | 0.88 | 0.82 | 0.00 | 0.00 | 0.00 | 0.99 | 0.98 | 0.01 | 0.00 | 1  | 0 | 0 | 1 | 1  |
| 9950  | ILMN_180690 | PRKCB1   | protein kinase   | 16 | -1.028 | 0.000 | 0.000 | -0.85 | -0.40 | -0.30 | -0.49 | -1.26 | 0.00 | 0.09 | 0.19 | 0.04 | 0.00 | 0.00 | 0.47 | 0.71 | 0.36 | 0.00 | 0  | 0 | 0 | 0 | -1 |
| 10019 | ILMN_166180 | PRRG4    | proline rich Gl  | 11 | 1.083  | 0.000 | 0.000 | 0.68  | 0.18  | -0.17 | 0.14  | 0.78  | 0.00 | 0.23 | 0.25 | 0.36 | 0.00 | 0.00 | 0.70 | 0.75 | 0.74 | 0.00 | 0  | 0 | 0 | 0 | 0  |
| 10098 | ILMN_178661 | PSME2    | proteasome (p    | 14 | 1.084  | 0.000 | 0.000 | 1.69  | 0.18  | 0.76  | 1.09  | 1.98  | 0.00 | 0.25 | 0.00 | 0.00 | 0.00 | 0.00 | 0.72 | 0.01 | 0.00 | 0.00 | 1  | 0 | 0 | 1 | 1  |
| 10194 | ILMN_175755 | PTRF     | polymerase I a   | 17 | -1.010 | 0.000 | 0.000 | 0.85  | 0.83  | 0.08  | 0.19  | 0.80  | 0.02 | 0.02 | 0.81 | 0.59 | 0.03 | 0.05 | 0.24 | 0.98 | 0.86 | 0.06 | 0  | 0 | 0 | 0 | 0  |
| 10199 | ILMN_175319 | PTTG1    | pituitary tumor  | 5  | 1.468  | 0.000 | 0.000 | 0.30  | -0.31 | 0.29  | 0.21  | 0.38  | 0.04 | 0.04 | 0.05 | 0.16 | 0.01 | 0.09 | 0.30 | 0.47 | 0.57 | 0.03 | 0  | 0 | 0 | 0 | 0  |
| 10200 | ILMN_204277 | PTTG1    | pituitary tumor  | 5  | 1.150  | 0.000 | 0.000 | 0.41  | -0.44 | 0.37  | 0.11  | 0.39  | 0.00 | 0.00 | 0.01 | 0.40 | 0.01 | 0.01 | 0.05 | 0.25 | 0.76 | 0.01 | 0  | 0 | 0 | 0 | 0  |
| 10204 | ILMN_204902 | PTTG3    | pituitary tumor  | 8  | 1.441  | 0.000 | 0.000 | 0.35  | -0.32 | 0.38  | 0.24  | 0.40  | 0.01 | 0.01 | 0.00 | 0.05 | 0.00 | 0.02 | 0.16 | 0.17 | 0.40 | 0.01 | 0  | 0 | 0 | 0 | 0  |
| 10253 | ILMN_241128 | QSOX1    | quiescin Q6 su   | 1  | 1.081  | 0.000 | 0.000 | 0.94  | 1.38  | 0.60  | 0.40  | 1.04  | 0.00 | 0.00 | 0.00 | 0.05 | 0.00 | 0.00 | 0.17 | 0.39 | 0.00 | 0    | 1  | 0 | 0 | 0 | 1  |
| 10295 | ILMN_166069 | RAB31    | RAB31, membr     | 18 | 1.003  | 0.000 | 0.000 | 0.03  | 0.24  | -0.04 | -0.12 | -0.12 | 0.77 | 0.04 | 0.76 | 0.29 | 0.29 | 0.84 | 0.32 | 0.96 | 0.69 | 0.38 | 0  | 0 | 0 | 0 | 0  |
| 10302 | ILMN_213497 | RAB38    | RAB38, membr     | 11 | 1.162  | 0.000 | 0.000 | -0.99 | 0.51  | -0.55 | -0.45 | -1.09 | 0.00 | 0.03 | 0.72 | 0.04 | 0.00 | 0.00 | 0.24 | 0.32 | 0.38 | 0.00 | 0  | 0 | 0 | 0 | -1 |
| 10348 | ILMN_170979 | RAC2     | ras-related C3   | 22 | 1.097  | 0.001 | 0.000 | -0.24 | -0.03 | 0.27  | -0.04 | -0.50 | 0.37 | 0.92 | 0.32 | 0.87 | 0.07 | 0.48 | 0.99 | 0.80 | 0.97 | 0.11 | 0  | 0 | 0 | 0 | 0  |
| 10372 | ILMN_168213 | RAI14    | retinoic acid in | 5  | -1.270 | 0.000 | 0.000 | -0.10 | -0.19 | 0.31  | 0.10  | -0.16 | 0.69 | 0.46 | 0.23 | 0.71 | 0.55 | 0.77 | 0.86 | 0.74 | 0.91 | 0.64 | 0  | 0 | 0 | 0 | 0  |
| 10384 | ILMN_172145 | RANBP1   | RAN binding pr   | 22 | 1.136  | 0.000 | 0.000 | -0.46 | 0.10  | -0.08 | -0.14 | -0.45 | 0.01 | 0.55 | 0.63 | 0.40 | 0.01 | 0.02 | 0.90 | 0.94 | 0.76 | 0.02 | 0  | 0 | 0 | 0 | 0  |
| 10507 | ILMN_180823 | RBPM52   | RNA binding pr   | 15 | -1.051 | 0.000 | 0.000 | -0.29 | -0.05 | 0.23  | 0.07  | -0.27 | 0.04 | 0.71 | 0.11 | 0.61 | 0.06 | 0.09 | 0.95 | 0.61 | 0.87 | 0.11 | 0  | 0 | 0 | 0 | 0  |
| 10540 | ILMN_206726 | RECK     | reversion-indu   | 9  | -1.081 | 0.000 | 0.000 | 0.13  | -0.26 | -0.10 | -0.15 | 0.29  | 0.32 | 0.05 | 0.45 | 0.24 | 0.03 | 0.44 | 0.36 | 0.87 | 0.65 | 0.05 | 0  | 0 | 0 | 0 | 0  |
| 10605 | ILMN_165601 | RG51     | regulator of G-  | 1  | 1.207  | 0.000 | 0.000 | -0.33 | -0.50 | 0.60  | 0.39  | 0.09  | 0.30 | 0.12 | 0.06 | 0.22 | 0.78 | 0.41 | 0.55 | 0.50 | 0.63 | 0.84 | 0  | 0 | 0 | 0 | 0  |
| 10614 | ILMN_173855 | RG520    | regulator of G-  | 8  | 1.711  | 0.000 | 0.000 | -0.02 | -0.18 | 0.28  | 0.29  | 0.01  | 0.95 | 0.52 | 0.33 | 0.31 | 0.96 | 0.96 | 0.89 | 0.81 | 0.70 | 0.97 | 0  | 0 | 0 | 0 | 0  |
| 10627 | ILMN_180220 | RHOB     | ras homolog g    | 2  | -1.119 | 0.000 | 0.000 | -0.15 | -0.04 | -0.01 | -0.21 | -0.12 | 0.23 | 0.74 | 0.93 | 0.08 | 0.31 | 0.33 | 0.96 | 0.99 | 0.47 | 0.40 | 0  | 0 | 0 | 0 | 0  |
| 10629 | ILMN_174494 | RHOBTB3  | Rho-related BT   | 5  | -1.545 | 0.000 | 0.000 | 0.21  | 0.21  | 0.12  | 0.05  | 0.04  | 0.18 | 0.19 | 0.43 | 0.74 | 0.79 | 0.28 | 0.66 | 0.86 | 0.92 | 0.84 | 0  | 0 | 0 | 0 | 0  |
| 10658 | ILMN_240413 | RIOK3    | RIO kinase 3 (   | 18 | 1.004  | 0.000 | 0.000 | 0.45  | 0.03  | 0.13  | 0.16  | 0.60  | 0.00 | 0.81 | 0.26 | 0.17 | 0.00 | 0.00 | 0.97 | 0.76 | 0.58 | 0.00 | 0  | 0 | 0 | 0 | 0  |
| 10678 | ILMN_177660 | RNASE4   | ribonuclease 4   | 14 | -1.729 | 0.000 | 0.000 | 0.23  | -0.64 | -0.64 | -0.60 | 0.26  | 0.38 | 0.02 | 0.02 | 0.03 | 0.32 | 0.50 | 0.20 | 0.33 | 0.32 | 0.41 | 0  | 0 | 0 | 0 | 0  |
| 10691 | ILMN_181078 | RNF11    | ring finger pro  | 1  | 1.201  | 0.000 | 0.000 | 0.30  | -0.01 | 0.13  | 0.02  | 0.49  | 0.01 | 0.96 | 0.24 | 0.84 | 0.00 | 0.03 | 1.00 | 0.74 | 0.95 | 0.00 | 0  | 0 | 0 | 0 | 0  |
| 10826 | ILMN_177105 | RPL29    | ribosomal prot   | 3  | 1.967  | 0.000 | 0.000 | -0.72 | 0.11  | -0.17 | -0.07 | -0.66 | 0.00 | 0.54 | 0.33 | 0.68 | 0.00 | 0.00 | 0.89 | 0.81 | 0.90 | 0.00 | 0  | 0 | 0 | 0 | 0  |
| 10827 | ILMN_173751 | RPL29    | ribosomal prot   | 3  | 2.135  | 0.000 | 0.000 | -0.66 | 0.08  | -0.04 | -0.02 | -0.58 | 0.00 | 0.65 | 0.84 | 0.89 | 0.00 | 0.00 | 0.94 | 0.98 | 0.97 | 0.01 | 0  | 0 | 0 | 0 | 0  |
| 10837 | ILMN_177482 | RPL34    | ribosomal prot   | 4  | 1.445  | 0.000 | 0.000 | -0.17 | 0.22  | 0.05  | 0.19  | 0.05  | 0.33 | 0.21 | 0.77 | 0.26 | 0.76 | 0.44 | 0.67 | 0.96 | 0.66 | 0.82 | 0  | 0 | 0 | 0 | 0  |
| 10856 | ILMN_171749 | RPL6     | ribosomal prot   | 12 | 1.535  | 0.000 | 0.000 | -0.26 | 0.05  | -0.08 | 0.12  | -0.17 | 0.09 | 0.74 | 0.61 | 0.42 | 0.26 | 0.16 | 0.96 | 0.93 | 0.77 | 0.36 | 0  | 0 | 0 | 0 | 0  |
| 10888 | ILMN_221913 | RPS15    | ribosomal prot   | 19 | 1.249  | 0.000 | 0.000 | -0.45 | 0.03  | -0.14 | -0.06 | -0.42 | 0.00 | 0.79 | 0.21 | 0.60 | 0.00 | 0.00 | 0.97 | 0.72 | 0.87 | 0.00 | 0  | 0 | 0 | 0 | 0  |
| 10902 | ILMN_239989 | RPS24    | ribosomal prot   | 10 | 1.505  | 0.000 | 0.000 | -0.23 | 0.07  | 0.17  | 0.24  | -0.21 | 0.13 | 0.63 | 0.25 | 0.11 | 0.17 | 0.21 | 0.93 | 0.75 | 0.51 | 0.25 | 0  | 0 | 0 | 0 | 0  |
| 10948 | ILMN_207007 | RPS7     | ribosomal prot   | 2  | 1.194  | 0.000 | 0.000 | -0.49 | 0.24  | 0.02  | 0.06  | -0.32 | 0.00 | 0.11 | 0.89 | 0.69 | 0.04 | 0.01 | 0.53 | 0.98 | 0.90 | 0.07 | 0  | 0 | 0 | 0 | 0  |
| 10949 | ILMN_175072 | RPS7     | ribosomal prot   | 2  | 1.452  | 0.000 | 0.000 | -0.46 | 0.34  | -0.04 | 0.11  | -0.34 | 0.01 | 0.04 | 0.83 | 0.51 | 0.05 | 0.02 | 0.33 | 0.98 | 0.82 | 0.08 | 0  | 0 | 0 | 0 | 0  |
| 10981 | ILMN_165787 | RSAD2    | radical S-adeni  | 2  | 1.230  | 0.000 | 0.000 | 4.65  | -0.26 | -0.03 | 2.44  | 5.75  | 0.00 | 0.64 | 0.96 | 0.00 | 0.00 | 0.00 | 0.93 | 1.00 | 0.02 | 0.00 | 1  | 0 | 0 | 1 | 1  |
| 11043 | ILMN_174891 | S100A12  | S100 calcium t   | 1  | 4.228  | 0.000 | 0.000 | 1.07  | -0.20 | 0.04  | 0.29  | 1.19  | 0.00 | 0.42 | 0.88 | 0.24 | 0.00 | 0.00 | 0.84 | 0.98 |      |      |    |   |   |   |    |

Table S2.xls

|       |             |          |                       |    |        |       |       |       |       |       |       |       |      |      |      |      |      |      |      |      |      |      |    |    |   |   |    |
|-------|-------------|----------|-----------------------|----|--------|-------|-------|-------|-------|-------|-------|-------|------|------|------|------|------|------|------|------|------|------|----|----|---|---|----|
| 11698 | ILMN_168385 | SLC7A1   | solute carrier f      | 13 | 1.171  | 0.000 | 0.000 | -1.22 | 0.18  | 0.22  | -0.18 | -1.45 | 0.00 | 0.44 | 0.33 | 0.42 | 0.00 | 0.00 | 0.85 | 0.81 | 0.78 | 0.00 | -1 | 0  | 0 | 0 | -1 |
| 11700 | ILMN_172037 | SLC7A5   | solute carrier f      | 16 | 1.649  | 0.000 | 0.000 | 0.20  | 0.30  | 0.38  | 0.36  | 0.50  | 0.57 | 0.38 | 0.27 | 0.30 | 0.16 | 0.67 | 0.82 | 0.77 | 0.69 | 0.23 | 0  | 0  | 0 | 0 | 0  |
| 11727 | ILMN_219976 | SLITRK4  | SLIT and NTRK X       | 8  | -1.036 | 0.000 | 0.000 | 0.46  | -0.39 | 0.29  | 0.18  | 0.40  | 0.01 | 0.03 | 0.11 | 0.32 | 0.03 | 0.03 | 0.28 | 0.59 | 0.71 | 0.06 | 0  | 0  | 0 | 0 | 0  |
| 11778 | ILMN_177538 | SMOX     | spermine oxid         | 20 | 1.747  | 0.000 | 0.000 | 0.04  | 0.32  | 0.12  | 0.15  | 0.04  | 0.85 | 0.14 | 0.56 | 0.48 | 0.85 | 0.89 | 0.57 | 0.92 | 0.80 | 0.89 | 0  | 0  | 0 | 0 | 0  |
| 11779 | ILMN_236725 | SMOX     | spermine oxid         | 20 | 1.717  | 0.000 | 0.000 | 0.16  | 0.42  | 0.23  | 0.17  | 0.19  | 0.46 | 0.06 | 0.30 | 0.44 | 0.39 | 0.58 | 0.40 | 0.79 | 0.78 | 0.49 | 0  | 0  | 0 | 0 | 0  |
| 11807 | ILMN_170193 | SNCA     | synuclein, alph       | 4  | -1.109 | 0.000 | 0.000 | -0.77 | -0.56 | -0.04 | -0.52 | -1.10 | 0.00 | 0.03 | 0.89 | 0.05 | 0.00 | 0.01 | 0.28 | 0.98 | 0.39 | 0.00 | 0  | 0  | 0 | 0 | -1 |
| 11855 | ILMN_179341 | SNTB1    | syntrophin, bel       | 8  | -1.016 | 0.000 | 0.000 | -0.44 | -0.77 | -0.05 | -0.29 | -0.70 | 0.03 | 0.00 | 0.80 | 0.15 | 0.00 | 0.07 | 0.01 | 0.97 | 0.56 | 0.00 | 0  | 0  | 0 | 0 | 0  |
| 11901 | ILMN_240650 | SOD2     | superoxide dis        | 6  | 1.911  | 0.000 | 0.000 | 2.00  | -1.20 | 1.22  | 1.41  | 2.47  | 0.00 | 0.00 | 0.00 | 0.00 | 0.00 | 0.00 | 0.05 | 0.13 | 0.06 | 0.00 | 1  | -1 | 0 | 1 | 1  |
| 11902 | ILMN_233678 | SOD2     | superoxide dis        | 6  | 2.296  | 0.000 | 0.000 | 1.26  | -1.04 | 0.96  | 1.07  | 1.46  | 0.00 | 0.00 | 0.00 | 0.00 | 0.00 | 0.00 | 0.01 | 0.06 | 0.02 | 0.00 | 1  | -1 | 0 | 1 | 1  |
| 11912 | ILMN_174979 | SORBS1   | sorbin and SH         | 10 | -2.276 | 0.000 | 0.000 | -0.31 | -0.22 | 0.25  | 0.08  | -0.35 | 0.09 | 0.23 | 0.18 | 0.65 | 0.06 | 0.17 | 0.70 | 0.71 | 0.89 | 0.10 | 0  | 0  | 0 | 0 | 0  |
| 11975 | ILMN_168925 | SPG3A    | spastic paraple       | 14 | -1.045 | 0.000 | 0.000 | -0.22 | 0.15  | 0.03  | 0.11  | -0.24 | 0.18 | 0.35 | 0.84 | 0.50 | 0.14 | 0.28 | 0.80 | 0.98 | 0.81 | 0.21 | 0  | 0  | 0 | 0 | 0  |
| 11976 | ILMN_238147 | SPG3A    | spastic paraple       | 14 | -1.021 | 0.000 | 0.000 | -0.29 | 0.13  | -0.02 | 0.08  | -0.30 | 0.10 | 0.44 | 0.89 | 0.65 | 0.09 | 0.18 | 0.85 | 0.98 | 0.89 | 0.14 | 0  | 0  | 0 | 0 | 0  |
| 11995 | ILMN_165628 | SPOCK2   | sparc/osteonec        | 10 | 1.091  | 0.001 | 0.000 | 0.18  | 0.14  | 0.11  | 0.25  | 0.56  | 0.38 | 0.49 | 0.58 | 0.22 | 0.01 | 0.50 | 0.88 | 0.92 | 0.63 | 0.02 | 0  | 0  | 0 | 0 | 0  |
| 12023 | ILMN_177224 | SQLE     | squalene epoxi        | 8  | 1.067  | 0.000 | 0.000 | 0.02  | -0.15 | 0.34  | 0.05  | 0.04  | 0.88 | 0.27 | 0.02 | 0.70 | 0.80 | 0.92 | 0.74 | 0.33 | 0.91 | 0.85 | 0  | 0  | 0 | 0 | 0  |
| 12024 | ILMN_166719 | SQRDL    | sulfide quinone       | 15 | 1.119  | 0.000 | 0.000 | 0.72  | -0.24 | 0.35  | 0.39  | 0.76  | 0.00 | 0.06 | 0.01 | 0.00 | 0.00 | 0.00 | 0.38 | 0.25 | 0.15 | 0.00 | 0  | 0  | 0 | 0 | 0  |
| 12042 | ILMN_176034 | SRGN     | serglycin (SRG        | 10 | 1.040  | 0.045 | 0.000 | 0.90  | 0.31  | 0.46  | 0.52  | 1.27  | 0.00 | 0.08 | 0.01 | 0.00 | 0.00 | 0.00 | 0.45 | 0.27 | 0.18 | 0.00 | 0  | 0  | 0 | 0 | 1  |
| 12067 | ILMN_180482 | SRXN1    | sulfiredoxin 1 l      | 20 | 1.026  | 0.000 | 0.000 | -0.70 | 0.43  | 0.44  | 0.18  | -0.69 | 0.03 | 0.17 | 0.16 | 0.57 | 0.03 | 0.07 | 0.63 | 0.68 | 0.86 | 0.06 | 0  | 0  | 0 | 0 | 0  |
| 12084 | ILMN_177548 | SSPN     | sarcospan (Krs        | 12 | -1.337 | 0.000 | 0.000 | 0.50  | -0.29 | 0.32  | 0.28  | 0.49  | 0.00 | 0.09 | 0.06 | 0.09 | 0.01 | 0.01 | 0.48 | 0.49 | 0.48 | 0.01 | 0  | 0  | 0 | 0 | 0  |
| 12149 | ILMN_169010 | STAT1    | signal transduc       | 2  | 1.906  | 0.000 | 0.000 | 3.09  | 0.13  | 0.41  | 1.46  | 3.22  | 0.00 | 0.56 | 0.06 | 0.00 | 0.00 | 0.00 | 0.90 | 0.49 | 0.00 | 0.00 | 1  | 0  | 0 | 1 | 1  |
| 12150 | ILMN_169136 | STAT1    | signal transduc       | 2  | 1.611  | 0.000 | 0.000 | 2.81  | 0.08  | 0.41  | 1.38  | 2.81  | 0.00 | 0.69 | 0.06 | 0.00 | 0.00 | 0.00 | 0.95 | 0.49 | 0.00 | 0.00 | 1  | 0  | 0 | 1 | 1  |
| 12151 | ILMN_177732 | STAT1    | signal transduc       | 2  | 1.048  | 0.000 | 0.000 | 2.04  | 0.08  | 0.16  | 0.93  | 1.95  | 0.00 | 0.62 | 0.33 | 0.00 | 0.00 | 0.00 | 0.92 | 0.81 | 0.00 | 0.00 | 1  | 0  | 0 | 0 | 1  |
| 12153 | ILMN_241098 | STAT3    | signal transduc       | 17 | 1.105  | 0.000 | 0.000 | 0.54  | -0.07 | 0.14  | 0.28  | 0.86  | 0.00 | 0.58 | 0.30 | 0.04 | 0.00 | 0.00 | 0.91 | 0.79 | 0.37 | 0.00 | 0  | 0  | 0 | 0 | 0  |
| 12154 | ILMN_166361 | STAT3    | signal transduc       | 17 | 1.128  | 0.000 | 0.000 | 0.52  | -0.06 | 0.04  | 0.19  | 0.82  | 0.00 | 0.66 | 0.80 | 0.18 | 0.00 | 0.00 | 0.94 | 0.97 | 0.59 | 0.00 | 0  | 0  | 0 | 0 | 0  |
| 12295 | ILMN_172774 | SYNCRIP  | synaptotagmin         | 6  | 1.164  | 0.000 | 0.000 | -0.09 | 0.09  | 0.14  | 0.13  | -0.09 | 0.36 | 0.37 | 0.16 | 0.19 | 0.36 | 0.47 | 0.82 | 0.68 | 0.59 | 0.46 | 0  | 0  | 0 | 0 | 0  |
| 12352 | ILMN_177866 | TAGLN    | transgelin (TAC       | 11 | -1.346 | 0.000 | 0.000 | 0.59  | 0.37  | -0.34 | -0.08 | 0.68  | 0.00 | 0.06 | 0.08 | 0.68 | 0.00 | 0.01 | 0.39 | 0.54 | 0.90 | 0.00 | 0  | 0  | 0 | 0 | 0  |
| 12353 | ILMN_240093 | TAGLN    | transgelin (TAC       | 11 | -1.869 | 0.000 | 0.000 | 0.01  | -0.01 | -0.05 | -0.02 | 0.19  | 0.95 | 0.94 | 0.72 | 0.88 | 0.21 | 0.97 | 0.99 | 0.96 | 0.97 | 0.29 | 0  | 0  | 0 | 0 | 0  |
| 12536 | ILMN_180517 | TGFA     | transforming q        | 2  | 1.205  | 0.000 | 0.000 | 0.43  | 1.52  | -0.09 | 0.04  | 0.78  | 0.09 | 0.00 | 0.70 | 0.86 | 0.00 | 0.16 | 0.00 | 0.95 | 0.96 | 0.01 | 0  | 1  | 0 | 0 | 0  |
| 12537 | ILMN_208394 | TGFA     | transforming q        | 2  | 1.312  | 0.000 | 0.000 | 0.49  | 1.64  | -0.28 | 0.01  | 0.80  | 0.06 | 0.00 | 0.28 | 0.95 | 0.00 | 0.12 | 0.00 | 0.78 | 0.99 | 0.01 | 0  | 1  | 0 | 0 | 0  |
| 12542 | ILMN_178428 | TGFBR3   | transforming g        | 1  | -1.382 | 0.000 | 0.000 | 0.19  | 0.21  | 0.08  | 0.01  | 0.18  | 0.11 | 0.07 | 0.49 | 0.95 | 0.13 | 0.19 | 0.41 | 0.89 | 0.99 | 0.20 | 0  | 0  | 0 | 0 | 0  |
| 12625 | ILMN_170146 | TIMP3    | TIMP metallopr        | 22 | -1.702 | 0.000 | 0.000 | -0.99 | -0.03 | -0.23 | -0.32 | -1.31 | 0.02 | 0.94 | 0.57 | 0.43 | 0.00 | 0.05 | 0.99 | 0.92 | 0.78 | 0.01 | 0  | 0  | 0 | 0 | -1 |
| 12639 | ILMN_180603 | TK1      | thymidine kinase 1, s | 15 | 1.193  | 0.000 | 0.000 | -0.31 | -0.58 | 0.00  | -0.37 | -0.52 | 0.16 | 0.01 | 0.99 | 0.10 | 0.02 | 0.25 | 1.00 | 1.00 | 0.49 | 0.04 | 0  | 0  | 0 | 0 | 0  |
| 12643 | ILMN_223441 | TLE3     | transducin-like       | 15 | 1.225  | 0.000 | 0.000 | -0.82 | -0.53 | -0.43 | -0.33 | -0.93 | 0.00 | 0.00 | 0.01 | 0.05 | 0.00 | 0.00 | 0.04 | 0.27 | 0.39 | 0.00 | 0  | 0  | 0 | 0 | 0  |
| 12716 | ILMN_205287 | TMEM116  | transmembran          | 12 | -1.141 | 0.000 | 0.000 | 0.07  | 0.17  | 0.23  | 0.17  | 0.00  | 0.40 | 0.05 | 0.01 | 0.05 | 0.97 | 0.52 | 0.36 | 0.25 | 0.40 | 0.98 | 0  | 0  | 0 | 0 | 0  |
| 12756 | ILMN_177393 | TMEM165  | transmembran          | 4  | 1.193  | 0.000 | 0.000 | 0.33  | 0.04  | 0.28  | 0.16  | 0.46  | 0.02 | 0.76 | 0.05 | 0.27 | 0.00 | 0.05 | 0.96 | 0.47 | 0.67 | 0.01 | 0  | 0  | 0 | 0 | 0  |
| 12817 | ILMN_177112 | TMEM45B  | transmembran          | 11 | 1.814  | 0.000 | 0.000 | -0.55 | 0.57  | -0.14 | -0.10 | -0.45 | 0.00 | 0.00 | 0.37 | 0.52 | 0.00 | 0.00 | 0.02 | 0.83 | 0.82 | 0.01 | 0  | 0  | 0 | 0 | 0  |
| 12828 | ILMN_171883 | TMEM57   | transmembran          | 1  | 1.018  | 0.000 | 0.000 | 0.27  | 0.05  | 0.01  | 0.03  | 0.27  | 0.01 | 0.61 | 0.93 | 0.78 | 0.01 | 0.03 | 0.92 | 0.99 | 0.94 | 0.03 | 0  | 0  | 0 | 0 | 0  |
| 12852 | ILMN_221106 | TMEM91   | transmembrane prote   | 1  | -1.102 | 0.000 | 0.000 | -1.08 | 0.51  | -0.35 | -0.34 | -1.39 | 0.00 | 0.07 | 0.21 | 0.22 | 0.00 | 0.00 | 0.41 | 0.72 | 0.63 | 0.00 | -1 | 0  | 0 | 0 | -1 |
| 12858 | ILMN_175817 | TMEM99   | transmembran          | 17 | -1.573 | 0.000 | 0.000 | -0.87 | -0.11 | -0.25 | -0.25 | -1.10 | 0.00 | 0.48 | 0.13 | 0.12 | 0.00 | 0.00 | 0.87 | 0.65 | 0.53 | 0.00 | 0  | 0  | 0 | 0 | -1 |
| 12900 | ILMN_169969 | TNFRSF21 | tumor necrosis        | 6  | 1.241  | 0.000 | 0.000 | -1.29 | 0.04  | -0.10 | -0.25 | -1.64 | 0.00 | 0.90 | 0.78 | 0.47 | 0.00 | 0.00 | 0.99 | 0.97 | 0.80 | 0.00 | -1 | 0  | 0 | 0 | -1 |
| 12904 | ILMN_233123 | TNFRSF6B | tumor necrosis        | 20 | 1.164  | 0.000 | 0.000 | 0.66  | 0.48  | 0.17  | 0.33  | 0.83  | 0.01 | 0.05 | 0.48 | 0.18 | 0.00 | 0.02 | 0.36 | 0.89 | 0.59 | 0.00 | 0  | 0  | 0 | 0 | 0  |
| 12923 | ILMN_170759 | TNIP3    | TNFAIP3 intera        | 4  | 1.604  | 0.000 | 0.000 | 1.62  | 0.06  | 0.65  | 1.08  | 2.14  | 0.00 | 0.90 | 0.17 | 0.03 | 0.00 | 0.01 | 0.99 | 0.70 | 0.32 | 0.00 | 1  | 0  | 0 | 0 | 1  |
| 12957 | ILMN_168609 | TOP2A    | topoisomerase         | 17 | 1.057  | 0.000 | 0.000 | -0.18 | -0.49 | 0.18  | -0.40 | -0.50 | 0.51 | 0.08 | 0.52 | 0.15 | 0.07 | 0.62 | 0.45 | 0.90 | 0.56 | 0.12 | 0  | 0  | 0 | 0 | 0  |
| 12995 | ILMN_171668 | TPM1     | tropomyosin 1         | 15 | -1.256 | 0.000 | 0.000 | -0.20 | -0.13 | -0.13 | -0.15 | -0.08 | 0.04 | 0.18 | 0.15 | 0.12 | 0.40 | 0.08 | 0.64 | 0.67 | 0.53 | 0.50 | 0  | 0  | 0 | 0 | 0  |
| 12996 | ILMN_236071 | TPM1     | tropomyosin 1         | 15 | -1.255 | 0.000 | 0.000 | -0.28 | -0.25 | -0.29 | -0.29 | -0.27 | 0.03 | 0.06 | 0.02 | 0.03 | 0.04 | 0.07 | 0.38 | 0.37 | 0.32 | 0.07 | 0  | 0  | 0 | 0 | 0  |
| 12997 | ILMN_178919 | TPM2     | tropomyosin 2         | 9  | -1.770 | 0.000 | 0.000 | -0.73 | 0.10  | -0.46 | -0.61 | -1.10 | 0.00 | 0.66 | 0.05 | 0.01 | 0.00 | 0.01 | 0.94 | 0.47 | 0.26 | 0.00 | 0  | 0  | 0 | 0 | -1 |
| 12998 | ILMN_175760 | TPM2     | tropomyosin 2         | 9  | -1.925 | 0.000 | 0.000 | -0.65 | 0.14  | -0.43 | -0.50 | -0.95 | 0.00 | 0.53 | 0.05 | 0.03 | 0.00 | 0.01 | 0.89 | 0.47 | 0.32 | 0.00 | 0  | 0  | 0 | 0 | 0  |
| 13037 | ILMN_178169 | TRAK2    | trafficking prot      | 2  | -1.023 | 0.000 | 0.000 | -0.58 | -0.23 | 0.04  | -0.23 | -0.80 | 0.00 | 0.08 | 0.74 | 0.08 | 0.00 | 0.00 | 0.45 | 0.96 | 0.47 | 0.00 | 0  | 0  | 0 | 0 | 0  |
| 13068 | ILMN_174507 | TRIM2    | tripartite motif      | 4  | -1.067 | 0.000 | 0.000 | -0.18 | -0.48 | 0.32  | -0.13 | -0.26 | 0.20 | 0.00 | 0.03 | 0.35 | 0.08 | 0.31 | 0.04 | 0.38 | 0.73 | 0.13 | 0  | 0  | 0 | 0 | 0  |
| 13070 | ILMN_177925 | TRIM22   | tripartite motif      | 11 | 1.604  | 0.000 | 0.000 | 1.72  | 0.10  | 0.01  | 0.77  | 2.32  | 0.00 | 0.67 | 0.98 | 0.00 | 0.00 | 0.00 | 0.94 | 1.00 | 1.03 | 0.00 | 1  | 0  | 0 | 0 | 1  |
| 13151 | ILMN_178756 | TSC22D1  | TSC22 domain          | 13 | -1.016 | 0.001 | 0.000 | 0.33  | -0.89 | 0.93  | 0.64  | 0.58  | 0.28 | 0.00 | 0.00 | 0.04 | 0.06 |      |      |      |      |      |    |    |   |   |    |

Table S2.xls

|       |             |         |                 |    |        |       |       |       |       |       |       |       |      |      |      |      |      |      |      |      |      |      |   |   |   |   |   |
|-------|-------------|---------|-----------------|----|--------|-------|-------|-------|-------|-------|-------|-------|------|------|------|------|------|------|------|------|------|------|---|---|---|---|---|
| 14314 | ILMN_236649 | ZNF706  | zinc finger pro | 8  | -1.069 | 0.000 | 0.000 | -0.45 | -0.09 | 0.13  | -0.12 | -0.66 | 0.00 | 0.43 | 0.26 | 0.31 | 0.00 | 0.00 | 0.85 | 0.76 | 0.70 | 0.00 | 0 | 0 | 0 | 0 | 0 |
| 14315 | ILMN_170238 | ZNF706  | zinc finger pro | 8  | -1.049 | 0.000 | 0.000 | -0.50 | -0.15 | -0.01 | -0.23 | -0.71 | 0.00 | 0.24 | 0.95 | 0.09 | 0.00 | 0.00 | 0.71 | 0.99 | 0.47 | 0.00 | 0 | 0 | 0 | 0 | 0 |
| 14351 | ILMN_180205 | ZNF91   | zinc finger pro | 19 | -1.178 | 0.000 | 0.000 | -0.04 | 0.04  | 0.01  | -0.02 | -0.08 | 0.79 | 0.82 | 0.93 | 0.87 | 0.63 | 0.85 | 0.97 | 0.99 | 0.97 | 0.71 | 0 | 0 | 0 | 0 | 0 |
| 14369 | ILMN_165494 | ZSCAN18 | zinc finger and | 19 | -1.622 | 0.000 | 0.000 | -0.28 | 0.04  | -0.01 | -0.19 | -0.25 | 0.04 | 0.75 | 0.95 | 0.17 | 0.08 | 0.09 | 0.96 | 0.99 | 0.58 | 0.13 | 0 | 0 | 0 | 0 | 0 |



**Table S4. Gene Set Enrichment Analysis (GSEA) of cytokine-treated macrophage pathways in psoriasis compared to control**

| <b>PATHWAY</b>          | <b>No of Genes</b> | <b>ES<sup>a</sup></b> | <b>NES<sup>b</sup></b> | <b>FDR</b> |
|-------------------------|--------------------|-----------------------|------------------------|------------|
| LPS- UP                 | 70                 | 0.84                  | 2.77                   | 0.000      |
| IFN $\gamma$ - UP       | 478                | 0.63                  | 2.49                   | 0.000      |
| LPS & IFN $\gamma$ - UP | 630                | 0.57                  | 2.31                   | 0.000      |
| TNF $\alpha$ - UP       | 29                 | 0.59                  | 1.64                   | 0.003      |
| IL4- DOWN               | 23                 | 0.58                  | 1.49                   | 0.013      |
| IL4- UP                 | 105                | 0.28                  | 0.97                   | 0.549      |
| LPS & IFN $\gamma$ DOWN | 519                | -0.35                 | -1.68                  | 0.009      |
| IFN $\gamma$ DOWN       | 297                | -0.32                 | -1.43                  | 0.037      |

<sup>a</sup>ES, enrichment score

<sup>b</sup>NES, normalized enrichment score

### **Connectivity Score**

We quantified the relationship between the UP and DOWN genes by calculating the connectivity score (CS) (Lamb *et al.*, 2006). The CS was determined for the IFN $\gamma$ , LPS+IFN $\gamma$  and IL-4 pathways, by subtracting the enrichment score (ES) for UP and DOWN genes for each pathway. A CS near 1 would indicate perfect agreement between a pathway and our psoriasis gene set, whereas 0 would indicate no agreement, and -1 a negative correlation. The highest CS was for IFN $\gamma$  (0.63- [-0.32] =0.95), next was LPS+IFN $\gamma$  (0.57- [-0.35] =0.92), and the IL-4 CS was lowest (0.58-0.28=0.3). TNF-DOWN and LPS-DOWN pathways did not have sufficient genes to generate a CS. Overall, this analysis showed that there was a significant over-expression of IFN $\gamma$ - and LPS-induced “M1” macrophage genes in psoriasis, with little “M2” signature.

**Table S5. Upregulated and downregulated genes in IL-4 and TNF-treated macrophages in common with Psoriasis**

| <b>Upregulated genes in IL-4 treated macrophages common with Psoriasis</b>   |                                                             |            |
|------------------------------------------------------------------------------|-------------------------------------------------------------|------------|
| <b>Gene Symbol</b>                                                           | <b>Description</b>                                          | <b>FCH</b> |
| DCUN1DS                                                                      | DCN1,defective in cullin neddylation 1, domain containing 3 | 3.32       |
| TGFA                                                                         | Transforming growth factor, alpha                           | 3.12       |
| DNASEIL3                                                                     | Deoxyribonuclease I-like 3                                  | 2.70       |
| QSOX1                                                                        | Quiescin Q6 sulfhydryl oxidase 1                            | 2.60       |
| CTSC                                                                         | Cathepsin C                                                 | 2.08       |
| <b>Downregulated genes in IL-4 treated macrophages common with Psoriasis</b> |                                                             |            |
| FAM134B                                                                      | Family with sequence similarity 134, member B               | 0.48       |
| AKR1C3                                                                       | Aldo-keto reductase family 1, member C3                     | 0.34       |

| <b>Upregulated genes in TNF-<math>\alpha</math> treated macrophages common with Psoriasis</b> |                                       |            |
|-----------------------------------------------------------------------------------------------|---------------------------------------|------------|
| <b>Gene Symbol</b>                                                                            | <b>Description</b>                    | <b>FCH</b> |
| CCL5                                                                                          | Chemokine (C-C motif) ligand 5        | 5.91       |
| CCL4L2                                                                                        | Chemokine (C-C motif) ligand 4-Like 2 | 3.48       |
| CCL4L1                                                                                        | Chemokine (C-C motif) ligand 4-Like 1 | 3.29       |
| GBP1                                                                                          | Guanylate binding protein 1           | 2.35       |

Table S6. Antibodies for Immunohistochemistry and Immunofluorescence

| Antigen               | Manufacturer             | Clone <sup>a</sup>     | Iso   | Dil   | Amplification/ detection <sup>b</sup> |
|-----------------------|--------------------------|------------------------|-------|-------|---------------------------------------|
| CD163                 | Acris                    | 5C6-FAT                | IgG1  | 1:100 | Goat anti-mouse IgG1-A568             |
| RFD7                  | Abcam                    | RFD7                   | IgG1  | 1:100 | Goat anti-mouse IgG1-A488             |
| LAMP-2/ CD107b (FITC) | eBioscience              | EBioH4B4               | IgG1  | 1:50  | Goat anti-FITC-A488                   |
| CD68                  | BD Pharmingen            | Y1/82A                 | IgG2b | 1:100 | Goat anti-mouse IgG2b-A488            |
| STABILIN/ MS1         | Gift *                   | Rabbit polyclonal      | IgG   | 1:100 | Goat anti-mouse IgG1-A488             |
| MARCO                 | Hycult biotechnology     | PLK-1                  | IgG3  | 1:10  | Goat anti-mouse IgG3-A488             |
| CD163-FITC            | Acris                    | 5C6-FAT                | IgG1  | 1:100 | Goat anti-FITC-A488                   |
| Factor XIIIa          | Enzyme Research          | AP Polyclonal Sheep    | Nil   | 1:100 | Donkey anti-sheep-A568                |
| CD11c                 | BD Pharmingen            | B-ly6                  | IgG1  | 1:100 | Goat anti-mouse IgG1-A568             |
| MMR/CD206             | GeneTex                  | 15-2                   | IgG1  | 1:100 | Goat anti-mouse IgG1-A488             |
| DC-SIGN/ CD209-FITC   | BD Pharmingen            | DCN46                  | IgG2b | 1:50  | Goat anti-FITC-A488                   |
| CD86(FITC)            | RDI                      | BU63                   | IgG1  | 1:100 | Goat anti-FITC-A488                   |
| CD40(FITC)            | BD Pharmingen            | 5C3                    | IgG1  | 1:100 | Goat anti-FITC-A488                   |
| DC-LAMP/ CD208-PE     | Immunotech               | 104.G4                 | IgG1  | 1:50  | Goat anti-mouse IgG1-A568             |
| DEC-205/CD205         | R.M. Steinman            | MG38                   | IgG2b | 1:100 | Goat anti-mouse IgG2b-A568            |
| CD83                  | Immunotech               | HB15a                  | IgG2b | 1:50  | Goat anti-FITC-A488                   |
| STAT 1                | BD Biosciences           | 1/Stat1                | IgG1  | 1:25  | Goat anti-mouse IgG1-A568             |
| CXCL9                 | R&D                      | 49106.11               | IgG1  | 1:50  | Goat anti-mouse IgG1-A568             |
| MxA/Mx1               | Santa Cruz               | Goat polyclonal D-14   | IgG   | 1:20  | Chicken anti-goat-A-594               |
| HLA-DR                | BD                       | L243                   | IgG2a | 1:100 | Goat anti-mouse IgG2a-A488            |
| IL23p19               | Biolegend                | HLT2736                | IgG1  | 1:50  | Goat anti-mouse IgG1-A568             |
| IL23p40(FITC)         | Biolegend                | C11.5                  | IgG1  | 1:50  | Goat anti-FITC-A488                   |
| INOS                  | Santa Cruz Biotechnology | Rabbit polyclonal N-20 | IgG   | 1:20  | Chicken anti-rabbit IgG-A488          |
| TNF- $\alpha$ (FITC)  | BD Biosciences           | 6401.1111              | IgG1  | 1:10  | Goat anti-FITC-A488                   |
| CD14 (FITC)           | BD Biosciences           | M phi P9               | IgG2b | 1:50  | Goat anti-FITC-A488                   |
| CD16 (FITC)           | BD Biosciences           | 3G8                    | IgG1  | 1:50  | Goat anti-FITC-A488                   |
| CD11a (FITC)          | Immunotech               | 25.3                   | IgG1  | 1:50  | Goat anti-FITC-A488                   |



<sup>a</sup>All are murine monoclonals unless stated

<sup>b</sup>All amplification/ detection antibodies are from Invitrogen /Molecular Probes unless stated

.
